# Supplementary material for: Identification of key lncRNAs contributing to diabetic nephropathy by gene co-expression network analysis
Source: PubMed Central journal article supplement (PMC6397236; doi:10.1038/s41598-019-39298-9), 2019-03-01
Supplement: 41598_2019_39298_MOESM1_ESM.pdf [file 41598_2019_39298_MOESM1_ESM.pdf]

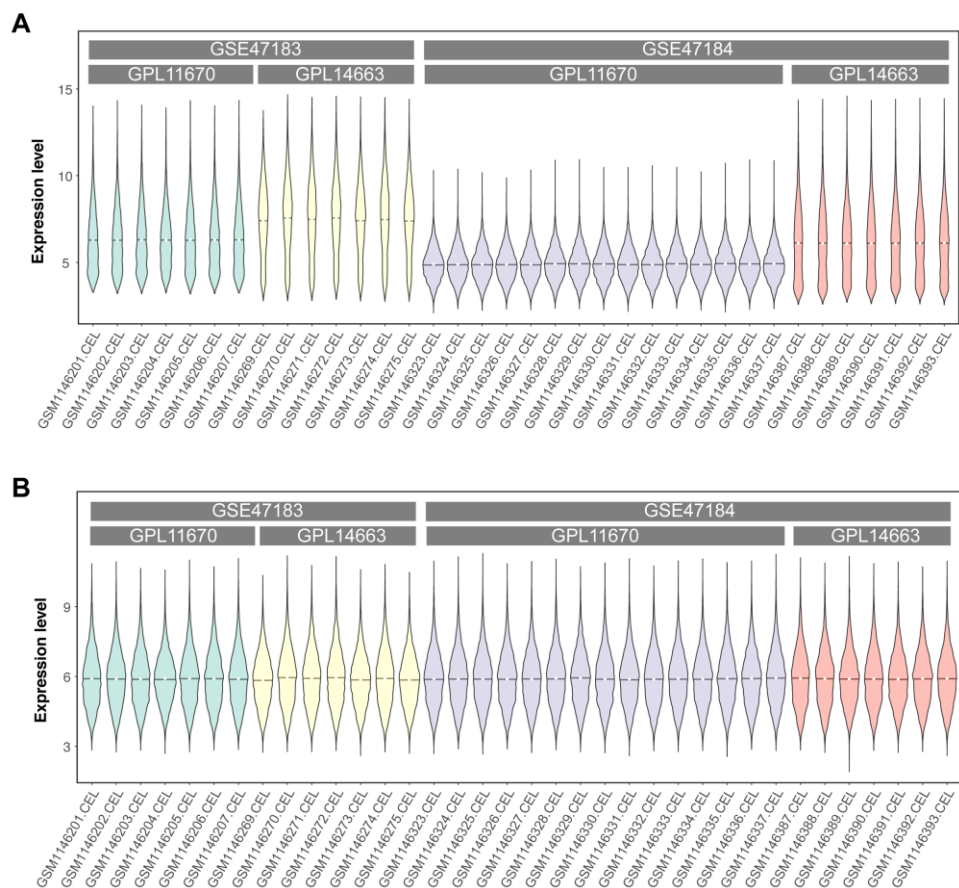

**Supplementary Figure S2.** Box plots of expression values within all samples. (A) Expression of all samples before batch effects removal. (B) Expression values of all samples after batch effects removal. Y axis corresponds to normalized expression values.

**Supplementary Table S1.** Differential expressed lncRNAs.

| RefSeq Accession | NOCODE Accession | Gene Symbol | CNCI Score | Chromosome Location            | TD vs TC    |           | GD vs GC    |           |
|------------------|------------------|-------------|------------|--------------------------------|-------------|-----------|-------------|-----------|
|                  |                  |             |            |                                | Fold change | P value   | Fold change | P value   |
| NR_029395.1      | NONHSAT245052.1  | IGLL3P      | -0.08      | chr22:25,318,25-7-25,320,227   | 17.18       | 3.33 E-05 | 5.81        | 1.25 E-02 |
| NR_024448.2      | NONHSAT083925.2  | GUSBP1      | -0.10      | chr22:23,638,48-7-23,717,423   | 6.48        | 9.42 E-04 | 4.30        | 1.52 E-02 |
| NR_038335.1      | NONHSAT215593.1  | CLU         | -0.01      | chr8:27,596,917-27,611,437     | 4.75        | 2.82 E-06 | 3.82        | 5.42 E-05 |
| NR_045494.1      | NONHSAT215593.1  | CLU         | -0.01      | chr8:27,596,917-27,611,751     | 4.75        | 2.82 E-06 | 3.82        | 5.42 E-05 |
| NR_130134.1      | NA               | ISG20       | -0.02      | chr5:35,856,849-35,879,603     | 3.83        | 6.39 E-05 | 2.33        | 1.52 E-02 |
| NR_026691.1      | NONHSAT160800.1  | IL10RA      | -0.06      | chr11:117,986,3-91-118,001,483 | 3.41        | 3.72 E-06 | 3.20        | 1.10 E-05 |
| NR_033390.1      | NONRATT000579.2  | TYROBP      | -0.03      | chr19:35,904,40-1-35,908,309   | 3.35        | 1.37 E-05 | 2.67        | 4.36 E-04 |

|           |               |         |       |                 |      |      |      |      |
|-----------|---------------|---------|-------|-----------------|------|------|------|------|
| NR_029467 | NONHSAT007472 |         |       | chr1:169,690,66 |      | 7.16 |      | 2.96 |
| .1        | .2            | SELL    | -0.01 | 5-169,708,856   | 3.22 | E-05 | 2.46 | E-03 |
| NR_120485 | NONHSAT171153 |         |       | chr15:88,635,63 |      | 3.45 |      | 7.28 |
| .1        | .1            | IL7R    | -0.08 | 7-88,656,344    | 2.33 | E-04 | 3.45 | E-07 |
| NR_109871 | NONMMUT00443  | TRAF3IP |       | chr1:209,756,03 |      | 3.27 |      | 8.15 |
| .1        | 5.2           | 3       | -0.06 | 2-209,779,657   | 2.11 | E-02 | 3.55 | E-04 |

**Supplementary Table S2.** DEGs identified in human diabetic nephropathy

| RefSeq Accession | Gene Symbol | GenBank ID | GD - GC |           | TD - TC |           |
|------------------|-------------|------------|---------|-----------|---------|-----------|
|                  |             |            | logFC   | adj.P.Val | logFC   | adj.P.Val |
| NM_000064.3      | C3          | 718        | 2.99    | 4.81E-06  | 3.97    | 7.84E-09  |
| NM_000089.3      | COL1A2      | 1278       | 2.24    | 5.86E-07  | 2.63    | 1.75E-08  |
| NM_000211.4      | ITGB2       | 3689       | 1.51    | 3.27E-06  | 1.81    | 6.40E-08  |
| NM_000358.2      | TGFBI       | 7045       | 1.46    | 3.48E-04  | 1.77    | 1.30E-05  |
| NM_000434.3      | NEU1        | 4758       | 1.01    | 3.37E-03  | 1.15    | 4.59E-04  |
| NM_000491.4      | C1QB        | 713        | 2.26    | 2.48E-07  | 2.31    | 2.08E-07  |
| NM_000560.3      | CD53        | 963        | 1.86    | 2.30E-07  | 2.18    | 5.86E-09  |
| NM_000582.2      | SPP1        | 6696       | 1.15    | 1.34E-03  | 1.05    | 1.90E-03  |
| NM_000587.3      | C7          | 730        | 2.13    | 9.50E-06  | 1.63    | 3.65E-04  |
| NM_000596.2      | IGFBP1      | 3484       | -2.02   | 1.72E-03  | -1.17   | 4.91E-02  |
| NM_000636.3      | SOD2        | 6648       | 1.14    | 1.69E-05  | 1.49    | 6.26E-08  |
| NM_000655.4      | SELL        | 6402       | 1.30    | 2.96E-03  | 1.69    | 7.16E-05  |
| NM_000689.4      | ALDH1A1     | 216        | 1.32    | 1.74E-02  | 1.19    | 1.91E-02  |
| NM_000693.3      | ALDH1A3     | 220        | 1.05    | 7.92E-06  | 1.03    | 9.93E-06  |
| NM_000732.4      | CD3D        | 915        | 1.73    | 1.93E-05  | 1.22    | 1.37E-03  |
| NM_000978.3      | RPL23       | 9349       | 1.40    | 7.51E-03  | 1.13    | 1.87E-02  |
| NM_001002029.3   | C4B         | 721        | 1.33    | 1.88E-02  | 1.23    | 1.76E-02  |
| NM_001002033.2   | HN1         | 51155      | 1.24    | 3.65E-06  | 1.05    | 5.20E-05  |
| NM_001002294.2   | FMO3        | 2328       | 1.03    | 2.51E-03  | 1.29    | 8.85E-05  |
| NM_001003927.2   | EVI2A       | 2123       | 2.01    | 1.74E-05  | 2.83    | 9.40E-09  |
| NM_001008389.2   | UMOD        | 7369       | -1.56   | 1.94E-02  | -1.63   | 7.69E-03  |
| NM_001008540.2   | CXCR4       | 7852       | 1.17    | 9.38E-04  | 1.19    | 4.43E-04  |
| NM_001024465.2   | SOD2        | 6648       | 1.44    | 4.92E-06  | 1.78    | 6.05E-08  |
| NM_001024466.2   | SOD2        | 6648       | 1.42    | 6.21E-06  | 1.78    | 5.82E-08  |
| NM_001034.3      | RRM2        | 6241       | 1.58    | 1.86E-06  | 1.53    | 3.54E-06  |
| NM_001040033.1   | CD53        | 963        | 1.86    | 2.30E-07  | 2.18    | 5.86E-09  |
| NM_001040058.1   | SPP1        | 6696       | 1.15    | 1.34E-03  | 1.05    | 1.90E-03  |
| NM_001040060.1   | SPP1        | 6696       | 1.15    | 1.34E-03  | 1.05    | 1.90E-03  |
| NM_001040651.1   | CD3D        | 915        | 2.20    | 8.55E-06  | 1.69    | 3.26E-04  |
| NM_001077654.2   | TNFAIP8     | 25816      | 1.30    | 2.72E-04  | 2.23    | 4.58E-09  |
| NM_001080494.3   | TTC39A      | 22996      | 1.16    | 5.48E-07  | 1.10    | 1.99E-06  |
| NM_001081455.1   | P2RY14      | 9934       | 1.43    | 1.38E-04  | 1.15    | 1.17E-03  |
| NM_001085.4      | SERPINA3    | 12         | 2.55    | 2.26E-06  | 2.80    | 3.53E-07  |
| NM_001098200.1   | GPR18       | 2841       | 1.36    | 2.53E-04  | 1.12    | 1.37E-03  |

|                |            |           |       |          |       |          |
|----------------|------------|-----------|-------|----------|-------|----------|
| NM_001100431.1 | VSIG4      | 11326     | 1.73  | 4.55E-08 | 1.32  | 1.79E-05 |
| NM_0011102.3   | ACTN1      | 87        | 1.21  | 1.17E-04 | 1.49  | 2.33E-06 |
| NM_001122951.2 | ACKR1      | 2532      | 1.15  | 7.79E-04 | 1.44  | 2.16E-05 |
| NM_001123041.2 | CCR2       | 729230    | 1.54  | 3.97E-04 | 2.50  | 4.70E-08 |
| NM_001126336.2 | VCAN       | 1462      | 1.18  | 6.85E-04 | 2.27  | 1.09E-09 |
| NM_001127491.2 | ITGB2      | 3689      | 1.51  | 3.27E-06 | 1.81  | 6.40E-08 |
| NM_001130004.1 | ACTN1      | 87        | 1.21  | 1.17E-04 | 1.49  | 2.33E-06 |
| NM_001130005.1 | ACTN1      | 87        | 1.23  | 1.24E-04 | 1.55  | 1.70E-06 |
| NM_001130415.1 | APOLD1     | 81575     | -2.04 | 1.32E-04 | -1.44 | 3.80E-03 |
| NM_001130715.1 | PLAC8      | 51316     | 1.06  | 3.08E-03 | 1.14  | 8.35E-04 |
| NM_001130716.1 | PLAC8      | 51316     | 1.29  | 9.40E-04 | 1.47  | 1.06E-04 |
| NM_001143782.1 | FKBP11     | 51303     | 1.00  | 1.50E-02 | 1.50  | 1.47E-04 |
| NM_001144832.2 | TTC39A     | 22996     | 1.16  | 5.48E-07 | 1.10  | 1.99E-06 |
| NM_001145459.1 | HOPX       | 84525     | 1.09  | 3.23E-02 | 2.49  | 8.99E-07 |
| NM_001145460.1 | HOPX       | 84525     | 1.09  | 3.23E-02 | 2.49  | 8.99E-07 |
| NM_001146590.1 | ETNPPL     | 64850     | -1.38 | 1.84E-02 | -2.24 | 6.91E-05 |
| NM_001146627.1 | ETNPPL     | 64850     | -1.38 | 1.84E-02 | -2.24 | 6.91E-05 |
| NM_001164097.1 | VCAN       | 1462      | 1.18  | 6.85E-04 | 2.27  | 1.09E-09 |
| NM_001164098.1 | VCAN       | 1462      | 1.18  | 6.85E-04 | 2.27  | 1.09E-09 |
| NM_001165931.1 | RRM2       | 6241      | 1.58  | 1.86E-06 | 1.53  | 3.54E-06 |
| NM_001173514.1 | TYROBP     | 7305      | 1.42  | 4.36E-04 | 1.74  | 1.37E-05 |
| NM_001173515.1 | TYROBP     | 7305      | 1.42  | 4.36E-04 | 1.74  | 1.37E-05 |
| NM_001177660.2 | HABP2      | 3026      | 1.32  | 1.03E-03 | 1.14  | 2.66E-03 |
| NM_001184830.1 | VSIG4      | 11326     | 1.73  | 4.55E-08 | 1.32  | 1.79E-05 |
| NM_001184831.1 | VSIG4      | 11326     | 1.73  | 4.55E-08 | 1.32  | 1.79E-05 |
| NM_001193289.1 | APOBEC3A_B | 100913187 | 1.11  | 5.72E-04 | 1.60  | 1.16E-06 |
| NM_001193333.2 | CORO1A     | 11151     | 1.64  | 1.04E-05 | 1.58  | 1.72E-05 |
| NM_001199149.1 | LTF        | 4057      | 3.34  | 2.54E-07 | 4.73  | 3.36E-11 |
| NM_001199739.1 | CTSS       | 1520      | 1.03  | 1.55E-04 | 1.58  | 2.73E-08 |
| NM_001207024.1 | M6PR       | 4074      | 1.01  | 3.76E-03 | 1.27  | 1.54E-04 |
| NM_001242823.2 | C4B_2      | 100293534 | 1.33  | 1.88E-02 | 1.23  | 1.76E-02 |
| NM_001243266.1 | MS4A4A     | 51338     | 2.62  | 3.35E-06 | 3.39  | 9.89E-09 |
| NM_001243759.1 | USP2       | 9099      | -1.22 | 1.80E-02 | -2.06 | 4.01E-05 |
| NM_001243962.1 | HLA-DQB1   | 3119      | 1.39  | 5.28E-06 | 1.81  | 1.51E-08 |
| NM_001247999.1 | MS4A6A     | 64231     | 2.02  | 3.10E-08 | 2.14  | 1.08E-08 |
| NM_001251829.1 | SPP1       | 6696      | 1.15  | 1.34E-03 | 1.05  | 1.90E-03 |
| NM_001251830.1 | SPP1       | 6696      | 1.15  | 1.34E-03 | 1.05  | 1.90E-03 |
| NM_001252204.1 | C4A        | 720       | 1.33  | 1.88E-02 | 1.23  | 1.76E-02 |
| NM_001255.2    | CDC20      | 991       | 1.25  | 2.73E-06 | 1.05  | 4.81E-05 |
| NM_001256030.1 | CD48       | 962       | 1.29  | 1.29E-06 | 1.23  | 3.38E-06 |
| NM_001256139.1 | CAPG       | 822       | 1.46  | 1.43E-04 | 1.16  | 1.26E-03 |
| NM_001256140.1 | CAPG       | 822       | 1.36  | 8.63E-04 | 1.18  | 2.06E-03 |
| NM_001257403.1 | VSIG4      | 11326     | 2.11  | 7.54E-08 | 1.90  | 1.17E-06 |
| NM_001270411.1 | APOBEC3B   | 9582      | 1.01  | 2.37E-04 | 1.20  | 1.30E-05 |

|                |          |       |       |          |       |          |
|----------------|----------|-------|-------|----------|-------|----------|
| NM_001271606.1 | BASP1    | 10409 | 1.04  | 4.29E-02 | 1.13  | 1.57E-02 |
| NM_001278614.1 | UMOD     | 7369  | -1.56 | 1.94E-02 | -1.63 | 7.69E-03 |
| NM_001278736.1 | CCL5     | 6352  | 1.80  | 2.56E-04 | 1.84  | 1.11E-04 |
| NM_001282431.1 | ARL4C    | 10123 | 1.65  | 2.42E-06 | 2.15  | 5.33E-09 |
| NM_001286813.1 | TNFAIP8  | 25816 | 1.30  | 2.72E-04 | 2.23  | 4.58E-09 |
| NM_001286814.1 | TNFAIP8  | 25816 | 1.30  | 2.72E-04 | 2.23  | 4.58E-09 |
| NM_001286815.1 | TNFAIP8  | 25816 | 1.30  | 2.72E-04 | 2.23  | 4.58E-09 |
| NM_001286817.1 | TNFAIP8  | 25816 | 1.30  | 2.72E-04 | 2.23  | 4.58E-09 |
| NM_001287754.1 | TRAF3IP3 | 80342 | 1.83  | 8.15E-04 | 1.08  | 3.27E-02 |
| NM_001288609.1 | HN1      | 51155 | 1.38  | 7.94E-06 | 1.21  | 5.41E-05 |
| NM_001288610.1 | HN1      | 51155 | 1.38  | 7.94E-06 | 1.21  | 5.41E-05 |
| NM_001293815.1 | ALDH1A3  | 220   | 1.05  | 7.92E-06 | 1.03  | 9.93E-06 |
| NM_001297663.1 | TTC39A   | 22996 | 1.16  | 5.48E-07 | 1.10  | 1.99E-06 |
| NM_001297664.1 | TTC39A   | 22996 | 1.16  | 5.48E-07 | 1.10  | 1.99E-06 |
| NM_001297665.1 | TTC39A   | 22996 | 1.16  | 5.48E-07 | 1.10  | 1.99E-06 |
| NM_001297666.1 | TTC39A   | 22996 | 1.16  | 5.48E-07 | 1.10  | 1.99E-06 |
| NM_001297667.1 | TTC39A   | 22996 | 1.16  | 5.48E-07 | 1.10  | 1.99E-06 |
| NM_001303233.1 | ISG20    | 3669  | 1.03  | 1.41E-02 | 1.24  | 1.52E-03 |
| NM_001303234.1 | ISG20    | 3669  | 1.03  | 1.41E-02 | 1.24  | 1.52E-03 |
| NM_001303235.1 | ISG20    | 3669  | 1.22  | 1.52E-02 | 1.94  | 6.39E-05 |
| NM_001303236.1 | ISG20    | 3669  | 1.12  | 1.17E-02 | 1.47  | 4.72E-04 |
| NM_001303237.1 | ISG20    | 3669  | 1.16  | 9.47E-03 | 1.50  | 3.72E-04 |
| NM_001303238.1 | ITGB2    | 3689  | 1.51  | 3.27E-06 | 1.81  | 6.40E-08 |
| NM_001306129.1 | FN1      | 2335  | 1.23  | 7.92E-06 | 1.43  | 3.53E-07 |
| NM_001306130.1 | FN1      | 2335  | 1.23  | 7.92E-06 | 1.43  | 3.53E-07 |
| NM_001306131.1 | FN1      | 2335  | 1.23  | 7.92E-06 | 1.43  | 3.53E-07 |
| NM_001306132.1 | FN1      | 2335  | 1.23  | 7.92E-06 | 1.43  | 3.53E-07 |
| NM_0013111.4   | CRIP1    | 1396  | 1.32  | 6.47E-03 | 1.54  | 7.45E-04 |
| NM_001319173.1 | FMO3     | 2328  | 1.03  | 2.51E-03 | 1.29  | 8.85E-05 |
| NM_001319174.1 | FMO3     | 2328  | 1.03  | 2.51E-03 | 1.29  | 8.85E-05 |
| NM_001320638.1 | CD53     | 963   | 1.86  | 2.30E-07 | 2.18  | 5.86E-09 |
| NM_001320732.1 | CAPG     | 822   | 1.46  | 1.43E-04 | 1.16  | 1.26E-03 |
| NM_001320733.1 | CAPG     | 822   | 1.46  | 1.43E-04 | 1.16  | 1.26E-03 |
| NM_001320734.1 | CAPG     | 822   | 1.60  | 1.10E-04 | 1.07  | 5.28E-03 |
| NM_001321121.1 | LTF      | 4057  | 3.34  | 2.54E-07 | 4.73  | 3.36E-11 |
| NM_001321122.1 | LTF      | 4057  | 3.34  | 2.54E-07 | 4.73  | 3.36E-11 |
| NM_001322814.1 | SOD2     | 6648  | 1.13  | 3.47E-05 | 1.49  | 1.40E-07 |
| NM_001322815.1 | SOD2     | 6648  | 1.13  | 3.92E-05 | 1.37  | 9.05E-07 |
| NM_001322817.1 | SOD2     | 6648  | 1.44  | 4.92E-06 | 1.78  | 6.05E-08 |
| NM_001322819.1 | SOD2     | 6648  | 1.14  | 1.69E-05 | 1.49  | 6.26E-08 |
| NM_001322820.1 | SOD2     | 6648  | 1.14  | 1.69E-05 | 1.49  | 6.26E-08 |
| NM_001323.3    | CST6     | 1474  | 1.06  | 1.25E-03 | 1.16  | 2.36E-04 |
| NM_001326317.1 | CELF2    | 10659 | 1.05  | 5.83E-03 | 1.36  | 1.93E-04 |
| NM_001326318.1 | CELF2    | 10659 | 1.05  | 5.83E-03 | 1.36  | 1.93E-04 |

|                |          |       |       |          |       |          |
|----------------|----------|-------|-------|----------|-------|----------|
| NM_001326319.1 | CELF2    | 10659 | 1.05  | 5.83E-03 | 1.36  | 1.93E-04 |
| NM_001326320.1 | CELF2    | 10659 | 1.05  | 5.83E-03 | 1.36  | 1.93E-04 |
| NM_001326321.1 | CELF2    | 10659 | 1.05  | 5.83E-03 | 1.36  | 1.93E-04 |
| NM_001326323.1 | CELF2    | 10659 | 1.05  | 5.83E-03 | 1.36  | 1.93E-04 |
| NM_001326324.1 | CELF2    | 10659 | 1.05  | 5.83E-03 | 1.36  | 1.93E-04 |
| NM_001326325.1 | CELF2    | 10659 | 1.05  | 5.83E-03 | 1.36  | 1.93E-04 |
| NM_001326326.1 | CELF2    | 10659 | 1.05  | 5.83E-03 | 1.36  | 1.93E-04 |
| NM_001326327.1 | CELF2    | 10659 | 1.05  | 5.83E-03 | 1.36  | 1.93E-04 |
| NM_001326328.1 | CELF2    | 10659 | 1.05  | 5.83E-03 | 1.36  | 1.93E-04 |
| NM_001326329.1 | CELF2    | 10659 | 1.05  | 5.83E-03 | 1.36  | 1.93E-04 |
| NM_001326330.1 | CELF2    | 10659 | 1.05  | 5.83E-03 | 1.36  | 1.93E-04 |
| NM_001326331.1 | CELF2    | 10659 | 1.05  | 5.83E-03 | 1.36  | 1.93E-04 |
| NM_001326332.1 | CELF2    | 10659 | 1.05  | 5.83E-03 | 1.36  | 1.93E-04 |
| NM_001326333.1 | CELF2    | 10659 | 1.05  | 5.83E-03 | 1.36  | 1.93E-04 |
| NM_001326334.1 | CELF2    | 10659 | 1.05  | 5.83E-03 | 1.36  | 1.93E-04 |
| NM_001326335.1 | CELF2    | 10659 | 1.05  | 5.83E-03 | 1.36  | 1.93E-04 |
| NM_001326336.1 | CELF2    | 10659 | 1.05  | 5.83E-03 | 1.36  | 1.93E-04 |
| NM_001326337.1 | CELF2    | 10659 | 1.05  | 5.83E-03 | 1.36  | 1.93E-04 |
| NM_001326338.1 | CELF2    | 10659 | 1.05  | 5.83E-03 | 1.36  | 1.93E-04 |
| NM_001326339.1 | CELF2    | 10659 | 1.05  | 5.83E-03 | 1.36  | 1.93E-04 |
| NM_001326340.1 | CELF2    | 10659 | 1.05  | 5.83E-03 | 1.36  | 1.93E-04 |
| NM_001326341.1 | CELF2    | 10659 | 1.05  | 5.83E-03 | 1.36  | 1.93E-04 |
| NM_001326342.1 | CELF2    | 10659 | 1.05  | 5.83E-03 | 1.36  | 1.93E-04 |
| NM_001326343.1 | CELF2    | 10659 | 1.05  | 5.83E-03 | 1.36  | 1.93E-04 |
| NM_001326344.1 | CELF2    | 10659 | 1.05  | 5.83E-03 | 1.36  | 1.93E-04 |
| NM_001326345.1 | CELF2    | 10659 | 1.05  | 5.83E-03 | 1.36  | 1.93E-04 |
| NM_001326346.1 | CELF2    | 10659 | 1.05  | 5.83E-03 | 1.36  | 1.93E-04 |
| NM_001326347.1 | CELF2    | 10659 | 1.05  | 5.83E-03 | 1.36  | 1.93E-04 |
| NM_001326348.1 | CELF2    | 10659 | 1.05  | 5.83E-03 | 1.36  | 1.93E-04 |
| NM_001326349.1 | CELF2    | 10659 | 1.05  | 5.83E-03 | 1.36  | 1.93E-04 |
| NM_001328609.1 | CD2      | 914   | 1.58  | 2.61E-06 | 1.33  | 4.24E-05 |
| NM_001329903.1 | SERPINF1 | 5176  | 1.55  | 2.44E-04 | 1.48  | 2.42E-04 |
| NM_001329904.1 | SERPINF1 | 5176  | 1.55  | 2.44E-04 | 1.48  | 2.42E-04 |
| NM_001329905.1 | SERPINF1 | 5176  | 1.55  | 2.44E-04 | 1.48  | 2.42E-04 |
| NM_001331031.1 | ETNPPL   | 64850 | -1.38 | 1.84E-02 | -2.24 | 6.91E-05 |
| NM_001331032.1 | ETNPPL   | 64850 | -1.38 | 1.84E-02 | -2.24 | 6.91E-05 |
| NM_001331033.1 | ETNPPL   | 64850 | -1.38 | 1.84E-02 | -2.24 | 6.91E-05 |
| NM_001347465.1 | C1QA     | 712   | 2.05  | 1.14E-07 | 1.78  | 3.17E-06 |
| NM_001347466.1 | C1QA     | 712   | 2.05  | 1.14E-07 | 1.78  | 3.17E-06 |
| NM_001347828.1 | PDGFRA   | 5156  | 1.21  | 7.51E-03 | 1.65  | 1.35E-04 |
| NM_001347829.1 | PDGFRA   | 5156  | 1.21  | 7.51E-03 | 1.65  | 1.35E-04 |
| NM_001347830.1 | PDGFRA   | 5156  | 1.21  | 7.51E-03 | 1.65  | 1.35E-04 |
| NM_001348056.1 | CXCR4    | 7852  | 1.17  | 9.38E-04 | 1.19  | 4.43E-04 |
| NM_001348059.1 | CXCR4    | 7852  | 1.17  | 9.38E-04 | 1.19  | 4.43E-04 |

|                |          |      |       |          |       |          |
|----------------|----------|------|-------|----------|-------|----------|
| NM_001348060.1 | CXCR4    | 7852 | 1.17  | 9.38E-04 | 1.19  | 4.43E-04 |
| NM_001558.3    | IL10RA   | 3587 | 1.68  | 1.10E-05 | 1.77  | 3.72E-06 |
| NM_001710.5    | CFB      | 629  | 1.79  | 4.77E-05 | 2.37  | 1.78E-07 |
| NM_001747.3    | CAPG     | 822  | 1.46  | 1.43E-04 | 1.16  | 1.26E-03 |
| NM_001765.2    | CD1C     | 911  | 1.23  | 3.83E-08 | 1.24  | 6.10E-08 |
| NM_001767.4    | CD2      | 914  | 1.58  | 2.61E-06 | 1.33  | 4.24E-05 |
| NM_001778.3    | CD48     | 962  | 1.97  | 4.87E-07 | 2.19  | 6.10E-08 |
| NM_001803.2    | CD52     | 1043 | 2.10  | 6.89E-06 | 1.58  | 3.67E-04 |
| NM_001831.3    | CLU      | 1191 | 1.93  | 5.42E-05 | 2.25  | 2.82E-06 |
| NM_001855.4    | COL15A1  | 1306 | 1.19  | 1.95E-03 | 1.92  | 8.99E-07 |
| NM_001870.3    | CPA3     | 1359 | 2.09  | 4.16E-06 | 2.72  | 1.12E-08 |
| NM_002001.3    | FCER1A   | 2205 | 1.23  | 1.24E-06 | 1.52  | 9.58E-09 |
| NM_002010.2    | FGF9     | 2254 | -1.66 | 1.87E-07 | -1.15 | 1.47E-04 |
| NM_002026.3    | FN1      | 2335 | 1.23  | 7.92E-06 | 1.43  | 3.53E-07 |
| NM_002036.3    | ACKR1    | 2532 | 1.15  | 7.79E-04 | 1.44  | 2.16E-05 |
| NM_002104.2    | GZMK     | 3003 | 1.85  | 1.76E-05 | 1.50  | 2.71E-04 |
| NM_002160.3    | TNC      | 3371 | 1.54  | 2.36E-04 | 3.07  | 3.55E-11 |
| NM_002163.2    | IRF8     | 3394 | 1.59  | 1.74E-05 | 1.88  | 5.95E-07 |
| NM_002185.3    | IL7R     | 3575 | 1.78  | 7.28E-07 | 1.22  | 3.45E-04 |
| NM_002201.5    | ISG20    | 3669 | 1.03  | 1.41E-02 | 1.24  | 1.52E-03 |
| NM_002341.1    | LTB      | 4050 | 1.86  | 3.83E-05 | 1.32  | 1.86E-03 |
| NM_002343.5    | LTF      | 4057 | 3.34  | 2.54E-07 | 4.73  | 3.36E-11 |
| NM_002345.3    | LUM      | 4060 | 2.66  | 3.17E-06 | 2.40  | 1.90E-05 |
| NM_002423.4    | MMP7     | 4316 | 2.47  | 5.28E-06 | 4.39  | 4.69E-12 |
| NM_002438.3    | MRC1     | 4360 | 1.48  | 1.10E-04 | 1.79  | 2.85E-06 |
| NM_002615.6    | SERPINF1 | 5176 | 1.55  | 2.44E-04 | 1.48  | 2.42E-04 |
| NM_002738.6    | PRKCB    | 5579 | 1.04  | 1.01E-03 | 1.08  | 3.54E-04 |
| NM_002838.4    | PTPRC    | 5788 | 1.40  | 4.39E-04 | 1.93  | 1.74E-06 |
| NM_002888.3    | RARRES1  | 5918 | 1.40  | 6.42E-06 | 1.09  | 2.37E-04 |
| NM_002909.4    | REG1A    | 5967 | 1.67  | 1.14E-04 | 1.44  | 4.75E-04 |
| NM_002985.2    | CCL5     | 6352 | 1.80  | 2.56E-04 | 1.84  | 1.11E-04 |
| NM_002993.3    | CXCL6    | 6372 | 2.38  | 3.20E-06 | 4.23  | 2.39E-12 |
| NM_003107.2    | SOX4     | 6659 | 1.18  | 2.42E-04 | 1.34  | 2.31E-05 |
| NM_003182.2    | TAC1     | 6863 | 1.76  | 2.04E-03 | 2.92  | 5.38E-07 |
| NM_003247.3    | THBS2    | 7058 | 2.05  | 1.79E-06 | 2.17  | 5.82E-07 |
| NM_003263.3    | TLR1     | 7096 | 1.01  | 1.00E-04 | 1.25  | 1.74E-06 |
| NM_003332.3    | TYROBP   | 7305 | 1.56  | 1.06E-04 | 1.76  | 1.08E-05 |
| NM_003361.3    | UMOD     | 7369 | -1.56 | 1.94E-02 | -1.63 | 7.69E-03 |
| NM_003467.2    | CXCR4    | 7852 | 1.17  | 9.38E-04 | 1.19  | 4.43E-04 |
| NM_004079.4    | CTSS     | 1520 | 1.03  | 1.55E-04 | 1.58  | 2.73E-08 |
| NM_004132.4    | HABP2    | 3026 | 1.32  | 1.03E-03 | 1.14  | 2.66E-03 |
| NM_004205.4    | USP2     | 9099 | -1.22 | 1.80E-02 | -2.06 | 4.01E-05 |
| NM_004244.5    | CD163    | 9332 | 1.90  | 1.22E-07 | 2.11  | 1.45E-08 |
| NM_004271.3    | LY86     | 9450 | 1.15  | 6.17E-05 | 1.20  | 2.26E-05 |

|             |          |       |       |          |       |          |
|-------------|----------|-------|-------|----------|-------|----------|
| NM_004288.4 | CYTIP    | 9595  | 1.20  | 6.71E-03 | 1.30  | 1.70E-03 |
| NM_004369.3 | COL6A3   | 1293  | 2.34  | 4.92E-06 | 2.61  | 4.93E-07 |
| NM_004385.4 | VCAN     | 1462  | 1.18  | 6.85E-04 | 2.27  | 1.09E-09 |
| NM_004585.4 | RARRES3  | 5920  | 1.43  | 2.66E-05 | 1.28  | 1.04E-04 |
| NM_004900.4 | APOBEC3B | 9582  | 1.01  | 2.37E-04 | 1.20  | 1.30E-05 |
| NM_004946.2 | DOCK2    | 1794  | 1.24  | 1.49E-05 | 1.09  | 8.10E-05 |
| NM_004951.4 | GPR183   | 1880  | 1.41  | 2.86E-04 | 1.24  | 7.41E-04 |
| NM_005022.3 | PFN1     | 5216  | 1.30  | 7.77E-04 | 1.30  | 4.23E-04 |
| NM_005292.3 | GPR18    | 2841  | 1.36  | 2.53E-04 | 1.12  | 1.37E-03 |
| NM_005556.3 | KRT7     | 3855  | 1.24  | 6.01E-04 | 1.13  | 9.79E-04 |
| NM_005615.4 | RNASE6   | 6039  | 1.43  | 3.50E-07 | 1.57  | 6.10E-08 |
| NM_005651.3 | TDO2     | 6999  | 1.50  | 1.46E-05 | 1.12  | 6.08E-04 |
| NM_005727.3 | TSPAN1   | 10103 | 1.40  | 5.42E-03 | 1.26  | 6.70E-03 |
| NM_005737.3 | ARL4C    | 10123 | 1.65  | 2.42E-06 | 2.15  | 5.33E-09 |
| NM_005849.3 | IGSF6    | 10261 | 1.08  | 1.83E-03 | 1.38  | 4.90E-05 |
| NM_006098.4 | RACK1    | 10399 | 1.13  | 1.61E-03 | 1.08  | 1.38E-03 |
| NM_006103.3 | WFDC2    | 10406 | 2.18  | 1.35E-05 | 2.22  | 9.08E-06 |
| NM_006144.3 | GZMA     | 3001  | 2.00  | 2.73E-05 | 2.30  | 1.77E-06 |
| NM_006169.2 | NNMT     | 4837  | 2.59  | 2.07E-07 | 3.22  | 1.08E-09 |
| NM_006206.5 | PDGFRA   | 5156  | 1.21  | 7.51E-03 | 1.65  | 1.35E-04 |
| NM_006274.2 | CCL19    | 6363  | 1.97  | 2.31E-04 | 2.04  | 8.44E-05 |
| NM_006317.4 | BASP1    | 10409 | 1.04  | 4.29E-02 | 1.13  | 1.57E-02 |
| NM_006398.3 | UBD      | 10537 | 1.28  | 2.90E-03 | 1.70  | 5.08E-05 |
| NM_006408.3 | AGR2     | 10551 | 1.29  | 7.79E-04 | 1.98  | 4.80E-07 |
| NM_006495.3 | EVI2B    | 2124  | 1.66  | 9.96E-04 | 2.55  | 7.31E-07 |
| NM_006762.2 | LAPTM5   | 7805  | 1.52  | 4.87E-05 | 2.14  | 4.71E-08 |
| NM_006894.5 | FMO3     | 2328  | 1.03  | 2.51E-03 | 1.29  | 8.85E-05 |
| NM_007074.3 | CORO1A   | 11151 | 1.64  | 1.04E-05 | 1.58  | 1.72E-05 |
| NM_007268.2 | VSIG4    | 11326 | 1.73  | 4.55E-08 | 1.32  | 1.79E-05 |
| NM_007293.2 | C4A      | 720   | 1.33  | 1.88E-02 | 1.23  | 1.76E-02 |
| NM_009588.1 | LTB      | 4050  | 1.86  | 3.83E-05 | 1.32  | 1.86E-03 |
| NM_013258.4 | PYCARD   | 29108 | 1.64  | 8.59E-04 | 1.86  | 1.01E-04 |
| NM_013996.2 | TAC1     | 6863  | 1.76  | 2.04E-03 | 2.92  | 5.38E-07 |
| NM_013997.2 | TAC1     | 6863  | 1.76  | 2.04E-03 | 2.92  | 5.38E-07 |
| NM_013998.2 | TAC1     | 6863  | 1.76  | 2.04E-03 | 2.92  | 5.38E-07 |
| NM_014210.3 | EVI2A    | 2123  | 2.01  | 1.74E-05 | 2.83  | 9.40E-09 |
| NM_014350.3 | TNFAIP8  | 25816 | 1.30  | 2.72E-04 | 2.23  | 4.58E-09 |
| NM_014879.3 | P2RY14   | 9934  | 1.43  | 1.38E-04 | 1.15  | 1.17E-03 |
| NM_015529.3 | MOXD1    | 26002 | 2.02  | 4.93E-05 | 2.27  | 5.25E-06 |
| NM_015675.3 | GADD45B  | 4616  | -1.40 | 2.68E-04 | -1.30 | 4.09E-04 |
| NM_015991.3 | C1QA     | 712   | 2.05  | 1.14E-07 | 1.78  | 3.17E-06 |
| NM_016562.3 | TLR7     | 51284 | 1.33  | 2.44E-04 | 1.39  | 7.73E-05 |
| NM_016619.2 | PLAC8    | 51316 | 1.29  | 9.40E-04 | 1.47  | 1.06E-04 |
| NM_018460.3 | ARHGAP15 | 55843 | 1.19  | 4.51E-05 | 1.10  | 9.53E-05 |



|                |          |       |       |          |       |          |
|----------------|----------|-------|-------|----------|-------|----------|
| NM_022349.3    | MS4A6A   | 64231 | 2.02  | 3.10E-08 | 2.14  | 1.08E-08 |
| NM_030817.2    | APOLD1   | 81575 | -2.04 | 1.32E-04 | -1.44 | 3.80E-03 |
| NM_031279.3    | ETNPPL   | 64850 | -1.38 | 1.84E-02 | -2.24 | 6.91E-05 |
| NM_032495.5    | HOPX     | 84525 | 1.09  | 3.23E-02 | 2.49  | 8.99E-07 |
| NM_033295.3    | CASP1    | 834   | 1.16  | 2.56E-04 | 2.37  | 3.36E-11 |
| NM_057166.4    | COL6A3   | 1293  | 2.34  | 4.92E-06 | 2.61  | 4.93E-07 |
| NM_057167.3    | COL6A3   | 1293  | 2.34  | 4.92E-06 | 2.61  | 4.93E-07 |
| NM_080921.3    | PTPRC    | 5788  | 1.40  | 4.39E-04 | 1.93  | 1.74E-06 |
| NM_139211.4    | HOPX     | 84525 | 1.09  | 3.23E-02 | 2.49  | 8.99E-07 |
| NM_139212.3    | HOPX     | 84525 | 1.09  | 3.23E-02 | 2.49  | 8.99E-07 |
| NM_144646.3    | JCHAIN   | 3512  | 3.02  | 3.25E-06 | 4.22  | 1.09E-09 |
| NM_145182.2    | PYCARD   | 29108 | 1.64  | 8.59E-04 | 1.86  | 1.01E-04 |
| NM_171997.2    | USP2     | 9099  | -1.22 | 1.80E-02 | -2.06 | 4.01E-05 |
| NM_198125.2    | TYROBP   | 7305  | 1.56  | 1.06E-04 | 1.76  | 1.08E-05 |
| NM_203416.3    | CD163    | 9332  | 2.00  | 2.45E-07 | 2.18  | 5.40E-08 |
| NM_206963.1    | RARRES1  | 5918  | 2.02  | 1.41E-07 | 1.75  | 3.75E-06 |
| NM_212474.2    | FN1      | 2335  | 1.23  | 7.92E-06 | 1.43  | 3.53E-07 |
| NM_212476.2    | FN1      | 2335  | 1.23  | 7.92E-06 | 1.43  | 3.53E-07 |
| NM_212478.2    | FN1      | 2335  | 1.23  | 7.92E-06 | 1.43  | 3.53E-07 |
| NM_212482.2    | FN1      | 2335  | 1.23  | 7.92E-06 | 1.43  | 3.53E-07 |
| NR_024448.2    | GUSBP11  | 91316 | 2.11  | 1.52E-02 | 2.70  | 9.42E-04 |
| NR_026691.1    | IL10RA   | 3587  | 1.68  | 1.10E-05 | 1.77  | 3.72E-06 |
| NR_029395.1    | IGLL3P   | 91353 | 2.54  | 1.25E-02 | 4.10  | 3.33E-05 |
| NR_029467.1    | SELL     | 6402  | 1.30  | 2.96E-03 | 1.69  | 7.16E-05 |
| NR_033390.1    | TYROBP   | 7305  | 1.42  | 4.36E-04 | 1.74  | 1.37E-05 |
| NR_038335.1    | CLU      | 1191  | 1.93  | 5.42E-05 | 2.25  | 2.82E-06 |
| NR_045494.1    | CLU      | 1191  | 1.93  | 5.42E-05 | 2.25  | 2.82E-06 |
| NR_109871.1    | TRAF3IP3 | 80342 | 1.83  | 8.15E-04 | 1.08  | 3.27E-02 |
| NR_120485.1    | IL7R     | 3575  | 1.78  | 7.28E-07 | 1.22  | 3.45E-04 |
| NR_130134.1    | ISG20    | 3669  | 1.22  | 1.52E-02 | 1.94  | 6.39E-05 |
| XM_005245625.1 | CD48     | 962   | 2.65  | 3.72E-07 | 3.28  | 2.45E-09 |
| XM_005246065.1 | COL6A3   | 1293  | 2.34  | 4.92E-06 | 2.61  | 4.93E-07 |
| XM_005246066.1 | COL6A3   | 1293  | 2.34  | 4.92E-06 | 2.61  | 4.93E-07 |
| XM_005246402.1 | FN1      | 2335  | 1.23  | 7.92E-06 | 1.43  | 3.53E-07 |
| XM_005246405.1 | FN1      | 2335  | 1.23  | 7.92E-06 | 1.43  | 3.53E-07 |
| XM_005246406.1 | FN1      | 2335  | 1.23  | 7.92E-06 | 1.43  | 3.53E-07 |
| XM_005246409.1 | FN1      | 2335  | 1.23  | 7.92E-06 | 1.43  | 3.53E-07 |
| XM_005246412.1 | FN1      | 2335  | 1.23  | 7.92E-06 | 1.43  | 3.53E-07 |
| XM_005246414.1 | FN1      | 2335  | 1.23  | 7.92E-06 | 1.43  | 3.53E-07 |
| XM_005247686.4 | RARRES1  | 5918  | 2.01  | 5.44E-08 | 1.76  | 1.57E-06 |
| XM_005247922.3 | P2RY14   | 9934  | 1.43  | 1.38E-04 | 1.15  | 1.17E-03 |
| XM_005247923.3 | P2RY14   | 9934  | 1.43  | 1.38E-04 | 1.15  | 1.17E-03 |
| XM_005248299.3 | IL7R     | 3575  | 1.78  | 7.28E-07 | 1.22  | 3.45E-04 |
| XM_005249051.4 | HLA-DQB2 | 3120  | 1.09  | 1.38E-04 | 1.19  | 2.37E-05 |

|                |              |           |       |          |       |          |
|----------------|--------------|-----------|-------|----------|-------|----------|
| XM_005249581.4 | AGR2         | 10551     | 1.29  | 7.79E-04 | 1.98  | 4.80E-07 |
| XM_005251972.3 | TNC          | 3371      | 1.54  | 2.36E-04 | 3.07  | 3.55E-11 |
| XM_005251973.3 | TNC          | 3371      | 1.54  | 2.36E-04 | 3.07  | 3.55E-11 |
| XM_005251974.3 | TNC          | 3371      | 1.54  | 2.36E-04 | 3.07  | 3.55E-11 |
| XM_005251975.3 | TNC          | 3371      | 1.54  | 2.36E-04 | 3.07  | 3.55E-11 |
| XM_005253274.3 | LOC101927562 | 101927562 | -1.15 | 9.73E-03 | -1.04 | 1.13E-02 |
| XM_005253529.4 | CD163        | 9332      | 2.04  | 1.58E-07 | 2.16  | 6.10E-08 |
| XM_005254899.2 | ISG20        | 3669      | 1.03  | 1.41E-02 | 1.24  | 1.52E-03 |
| XM_005257946.3 | EVI2B        | 2124      | 1.66  | 9.96E-04 | 2.55  | 7.31E-07 |
| XM_005259642.1 | VAV1         | 7409      | 1.06  | 5.97E-03 | 1.11  | 2.09E-03 |
| XM_005262662.4 | TLR1         | 7096      | 1.01  | 1.00E-04 | 1.25  | 1.74E-06 |
| XM_005265743.1 | PDGFRA       | 5156      | 1.21  | 7.51E-03 | 1.65  | 1.35E-04 |
| XM_005271721.4 | USP2         | 9099      | -1.22 | 1.80E-02 | -2.06 | 4.01E-05 |
| XM_005271722.2 | USP2         | 9099      | -1.22 | 1.80E-02 | -2.06 | 4.01E-05 |
| XM_006711472.3 | PTPRC        | 5788      | 1.40  | 4.39E-04 | 1.93  | 1.74E-06 |
| XM_006711473.3 | PTPRC        | 5788      | 1.40  | 4.39E-04 | 1.93  | 1.74E-06 |
| XM_006711474.3 | PTPRC        | 5788      | 1.40  | 4.39E-04 | 1.93  | 1.74E-06 |
| XM_006712253.1 | COL6A3       | 1293      | 2.34  | 4.92E-06 | 2.61  | 4.93E-07 |
| XM_006714211.2 | JCHAIN       | 3512      | 3.02  | 3.25E-06 | 4.22  | 1.09E-09 |
| XM_006714212.2 | JCHAIN       | 3512      | 3.02  | 3.25E-06 | 4.22  | 1.09E-09 |
| XM_006716284.2 | CLU          | 1191      | 1.99  | 1.45E-04 | 2.46  | 2.87E-06 |
| XM_006717096.3 | TNC          | 3371      | 1.54  | 2.36E-04 | 3.07  | 3.55E-11 |
| XM_006717097.3 | TNC          | 3371      | 1.54  | 2.36E-04 | 3.07  | 3.55E-11 |
| XM_006717098.3 | TNC          | 3371      | 1.54  | 2.36E-04 | 3.07  | 3.55E-11 |
| XM_006717101.3 | TNC          | 3371      | 1.54  | 2.36E-04 | 3.07  | 3.55E-11 |
| XM_006718661.2 | MS4A6A       | 64231     | 2.02  | 3.10E-08 | 2.14  | 1.08E-08 |
| XM_006719946.3 | GPR18        | 2841      | 1.36  | 2.53E-04 | 1.12  | 1.37E-03 |
| XM_006720488.3 | ISG20        | 3669      | 1.03  | 1.41E-02 | 1.24  | 1.52E-03 |
| XM_006724001.1 | ITGB2        | 3689      | 1.51  | 3.27E-06 | 1.81  | 6.40E-08 |
| XM_011509345.2 | FMO3         | 2328      | 1.03  | 2.51E-03 | 1.29  | 8.85E-05 |
| XM_011510018.2 | TRAF3IP3     | 80342     | 1.89  | 1.19E-03 | 1.33  | 1.33E-02 |
| XM_011510171.1 | CD48         | 962       | 1.97  | 4.87E-07 | 2.19  | 6.10E-08 |
| XM_011510574.1 | COL6A3       | 1293      | 2.34  | 4.92E-06 | 2.61  | 4.93E-07 |
| XM_011511479.2 | ARHGAP15     | 55843     | 1.19  | 4.51E-05 | 1.10  | 9.53E-05 |
| XM_011511483.1 | ARHGAP15     | 55843     | 1.19  | 4.51E-05 | 1.10  | 9.53E-05 |
| XM_011513340.2 | P2RY14       | 9934      | 1.43  | 1.38E-04 | 1.15  | 1.17E-03 |
| XM_011513742.2 | TLR1         | 7096      | 1.01  | 1.00E-04 | 1.25  | 1.74E-06 |
| XM_011513743.2 | TLR1         | 7096      | 1.01  | 1.00E-04 | 1.25  | 1.74E-06 |
| XM_011513744.2 | TLR1         | 7096      | 1.01  | 1.00E-04 | 1.25  | 1.74E-06 |
| XM_011513745.2 | TLR1         | 7096      | 1.01  | 1.00E-04 | 1.25  | 1.74E-06 |
| XM_011518214.2 | COL15A1      | 1306      | 1.19  | 1.95E-03 | 1.92  | 8.99E-07 |
| XM_011518625.2 | TNC          | 3371      | 1.54  | 2.36E-04 | 3.07  | 3.55E-11 |
| XM_011518626.2 | TNC          | 3371      | 1.54  | 2.36E-04 | 3.07  | 3.55E-11 |
| XM_011518628.2 | TNC          | 3371      | 1.54  | 2.36E-04 | 3.07  | 3.55E-11 |

|                |          |       |       |          |       |          |
|----------------|----------|-------|-------|----------|-------|----------|
| XM_011518629.2 | TNC      | 3371  | 1.54  | 2.36E-04 | 3.07  | 3.55E-11 |
| XM_011521521.2 | ISG20    | 3669  | 1.22  | 1.52E-02 | 1.94  | 6.39E-05 |
| XM_011531925.1 | JCHAIN   | 3512  | 3.02  | 3.25E-06 | 4.22  | 1.09E-09 |
| XM_011531926.1 | JCHAIN   | 3512  | 3.02  | 3.25E-06 | 4.22  | 1.09E-09 |
| XM_011533122.1 | CAPG     | 822   | 1.46  | 1.43E-04 | 1.16  | 1.26E-03 |
| XM_011533123.1 | CAPG     | 822   | 1.46  | 1.43E-04 | 1.16  | 1.26E-03 |
| XM_011534996.2 | FGF9     | 2254  | -1.66 | 1.87E-07 | -1.15 | 1.47E-04 |
| XM_011537265.2 | ACTN1    | 87    | 1.21  | 1.17E-04 | 1.49  | 2.33E-06 |
| XM_011537266.2 | ACTN1    | 87    | 1.21  | 2.93E-04 | 1.54  | 4.07E-06 |
| XM_011537267.2 | ACTN1    | 87    | 1.20  | 2.39E-04 | 1.50  | 4.38E-06 |
| XM_011537268.2 | ACTN1    | 87    | 1.21  | 2.93E-04 | 1.54  | 4.07E-06 |
| XM_011538325.1 | KRT7     | 3855  | 1.10  | 9.14E-03 | 1.48  | 2.53E-04 |
| XM_011540460.2 | TSPAN1   | 10103 | 1.36  | 1.28E-02 | 1.32  | 8.71E-03 |
| XM_011542059.2 | C1QB     | 713   | 2.30  | 4.05E-08 | 2.14  | 3.57E-07 |
| XM_011542098.2 | LAPTM5   | 7805  | 1.52  | 4.87E-05 | 2.14  | 4.71E-08 |
| XM_011545714.2 | CORO1A   | 11151 | 1.64  | 1.04E-05 | 1.58  | 1.72E-05 |
| XM_011545934.1 | UMOD     | 7369  | -1.56 | 1.94E-02 | -1.63 | 7.69E-03 |
| XM_011545935.1 | UMOD     | 7369  | -1.56 | 1.94E-02 | -1.63 | 7.69E-03 |
| XM_011545936.1 | UMOD     | 7369  | -1.56 | 1.94E-02 | -1.63 | 7.69E-03 |
| XM_011545937.1 | UMOD     | 7369  | -1.56 | 1.94E-02 | -1.63 | 7.69E-03 |
| XM_011545938.1 | UMOD     | 7369  | -1.56 | 1.94E-02 | -1.63 | 7.69E-03 |
| XM_011545940.1 | UMOD     | 7369  | -1.56 | 1.94E-02 | -1.63 | 7.69E-03 |
| XM_017002867.1 | CD48     | 962   | 2.39  | 3.47E-07 | 2.59  | 7.02E-08 |
| XM_017003303.1 | COL6A3   | 1293  | 2.34  | 4.92E-06 | 2.61  | 4.93E-07 |
| XM_017003304.1 | COL6A3   | 1293  | 2.34  | 4.92E-06 | 2.61  | 4.93E-07 |
| XM_017003692.1 | FN1      | 2335  | 1.23  | 7.92E-06 | 1.43  | 3.53E-07 |
| XM_017003693.1 | FN1      | 2335  | 1.23  | 7.92E-06 | 1.43  | 3.53E-07 |
| XM_017003694.1 | FN1      | 2335  | 1.23  | 7.92E-06 | 1.43  | 3.53E-07 |
| XM_017004499.1 | ARHGAP15 | 55843 | 1.19  | 4.51E-05 | 1.10  | 9.53E-05 |
| XM_017004500.1 | ARHGAP15 | 55843 | 1.19  | 4.51E-05 | 1.10  | 9.53E-05 |
| XM_017005386.1 | CYTIP    | 9595  | 1.20  | 6.71E-03 | 1.30  | 1.70E-03 |
| XM_017007583.1 | P2RY14   | 9934  | 1.43  | 1.38E-04 | 1.15  | 1.17E-03 |
| XM_017008564.1 | SPP1     | 6696  | 1.15  | 1.34E-03 | 1.05  | 1.90E-03 |
| XM_017008571.1 | TLR1     | 7096  | 1.01  | 1.00E-04 | 1.25  | 1.74E-06 |
| XM_017008572.1 | TLR1     | 7096  | 1.01  | 1.00E-04 | 1.25  | 1.74E-06 |
| XM_017008728.1 | HOPX     | 84525 | 1.09  | 3.23E-02 | 2.49  | 8.99E-07 |
| XM_017008729.1 | HOPX     | 84525 | 1.09  | 3.23E-02 | 2.49  | 8.99E-07 |
| XM_017008730.1 | HOPX     | 84525 | 1.09  | 3.23E-02 | 2.49  | 8.99E-07 |
| XM_017008731.1 | HOPX     | 84525 | 1.09  | 3.23E-02 | 2.49  | 8.99E-07 |
| XM_017008732.1 | HOPX     | 84525 | 1.09  | 3.23E-02 | 2.49  | 8.99E-07 |
| XM_017008733.1 | HOPX     | 84525 | 1.09  | 3.23E-02 | 2.49  | 8.99E-07 |
| XM_017008734.1 | HOPX     | 84525 | 1.09  | 3.23E-02 | 2.49  | 8.99E-07 |
| XM_017009327.1 | TNFAIP8  | 25816 | 1.30  | 2.72E-04 | 2.23  | 4.58E-09 |
| XM_017009328.1 | TNFAIP8  | 25816 | 1.30  | 2.72E-04 | 2.23  | 4.58E-09 |

|                |          |       |       |          |       |          |
|----------------|----------|-------|-------|----------|-------|----------|
| XM_017010714.1 | MOXD1    | 26002 | 2.02  | 4.93E-05 | 2.27  | 5.25E-06 |
| XM_017010715.1 | MOXD1    | 26002 | 2.02  | 4.93E-05 | 2.27  | 5.25E-06 |
| XM_017014678.1 | TNC      | 3371  | 1.54  | 2.36E-04 | 3.07  | 3.55E-11 |
| XM_017014679.1 | TNC      | 3371  | 1.54  | 2.36E-04 | 3.07  | 3.55E-11 |
| XM_017014680.1 | TNC      | 3371  | 1.54  | 2.36E-04 | 3.07  | 3.55E-11 |
| XM_017014681.1 | TNC      | 3371  | 1.54  | 2.36E-04 | 3.07  | 3.55E-11 |
| XM_017018124.1 | MS4A6A   | 64231 | 2.02  | 3.10E-08 | 2.14  | 1.08E-08 |
| XM_017018539.1 | USP2     | 9099  | -1.22 | 1.80E-02 | -2.06 | 4.01E-05 |
| XM_017018543.1 | CD3D     | 915   | 1.73  | 1.93E-05 | 1.22  | 1.37E-03 |
| XM_017019294.1 | KRT7     | 3855  | 1.24  | 6.01E-04 | 1.13  | 9.79E-04 |
| XM_017020405.1 | GPR183   | 1880  | 1.41  | 2.86E-04 | 1.24  | 7.41E-04 |
| XM_017021566.1 | RNASE6   | 6039  | 1.43  | 3.50E-07 | 1.57  | 6.10E-08 |
| XM_017021567.1 | RNASE6   | 6039  | 1.43  | 3.50E-07 | 1.57  | 6.10E-08 |
| XM_017021720.1 | ACTN1    | 87    | 1.21  | 1.17E-04 | 1.49  | 2.33E-06 |
| XM_017021721.1 | ACTN1    | 87    | 1.21  | 1.17E-04 | 1.49  | 2.33E-06 |
| XM_017021722.1 | ACTN1    | 87    | 1.21  | 1.17E-04 | 1.49  | 2.33E-06 |
| XM_017021723.1 | ACTN1    | 87    | 1.21  | 1.17E-04 | 1.49  | 2.33E-06 |
| XM_017021725.1 | ACTN1    | 87    | 1.21  | 1.17E-04 | 1.49  | 2.33E-06 |
| XM_017021726.1 | ACTN1    | 87    | 1.21  | 1.17E-04 | 1.49  | 2.33E-06 |
| XM_017021727.1 | ACTN1    | 87    | 1.21  | 2.93E-04 | 1.54  | 4.07E-06 |
| XM_017021728.1 | ACTN1    | 87    | 1.21  | 2.93E-04 | 1.54  | 4.07E-06 |
| XM_017022147.1 | ISG20    | 3669  | 1.12  | 1.17E-02 | 1.47  | 4.72E-04 |
| XM_017022148.1 | ISG20    | 3669  | 1.16  | 9.47E-03 | 1.50  | 3.72E-04 |
| XM_017022885.1 | CORO1A   | 11151 | 1.64  | 1.04E-05 | 1.58  | 1.72E-05 |
| XM_017022886.1 | CORO1A   | 11151 | 1.64  | 1.04E-05 | 1.58  | 1.72E-05 |
| XM_017023199.1 | IRF8     | 3394  | 1.59  | 1.74E-05 | 1.88  | 5.95E-07 |
| XM_017023641.1 | UMOD     | 7369  | -1.56 | 1.94E-02 | -1.63 | 7.69E-03 |
| XM_017024761.1 | PFN1     | 5216  | 1.30  | 1.65E-03 | 1.33  | 7.39E-04 |
| XM_017026822.1 | GADD45B  | 4616  | -1.40 | 2.68E-04 | -1.30 | 4.09E-04 |
| XM_017028341.1 | ITGB2    | 3689  | 1.51  | 3.27E-06 | 1.81  | 6.40E-08 |
| XM_017029251.1 | VSIG4    | 11326 | 2.11  | 7.54E-08 | 1.90  | 1.17E-06 |
| XM_017030289.1 | C4A      | 720   | 1.33  | 1.88E-02 | 1.23  | 1.76E-02 |
| XR_001738850.1 | ARHGAP15 | 55843 | 1.19  | 4.51E-05 | 1.10  | 9.53E-05 |
| XR_001740228.1 | RARRES1  | 5918  | 2.37  | 2.45E-09 | 1.97  | 4.36E-07 |
| XR_001748699.1 | KRT7     | 3855  | 1.24  | 6.01E-04 | 1.13  | 9.79E-04 |
| XR_001748700.1 | KRT7     | 3855  | 1.10  | 9.14E-03 | 1.48  | 2.53E-04 |
| XR_925163.2    | TLR1     | 7096  | 1.01  | 1.00E-04 | 1.25  | 1.74E-06 |
| XR_925165.1    | TLR1     | 7096  | 1.01  | 1.00E-04 | 1.25  | 1.74E-06 |

**Supplementary Table S3.** Preservation score of modules derived from WGCNA

| Module | MedianRank.pre<br>s | MedianRank.qua<br>l | Zsummary.pre<br>s | Zsummary.qua<br>l |
|--------|---------------------|---------------------|-------------------|-------------------|
| black  | 10                  | 14                  | 29                | 37                |

|              |    |      |     |       |
|--------------|----|------|-----|-------|
| blue         | 19 | 22   | 46  | 41    |
| brown        | 16 | 20   | 49  | 55    |
| cyan         | 5  | 10   | 20  | 18    |
| darkgreen    | 4  | 15   | 12  | 10    |
| darkred      | 2  | 3    | 13  | 15    |
| gold         | 23 | 23   | 34  | -0.62 |
| green        | 21 | 21   | 30  | 38    |
| greenyellow  | 18 | 19   | 18  | 16    |
| grey         | 23 | 24   | 5.7 | -1.8  |
| grey60       | 22 | 12.5 | 11  | 11    |
| lightcyan    | 15 | 11   | 13  | 15    |
| lightgreen   | 3  | 4    | 14  | 16    |
| lightyellow  | 11 | 7.5  | 12  | 13    |
| magenta      | 10 | 8.5  | 18  | 24    |
| midnightblue | 8  | 6    | 13  | 16    |
| pink         | 6  | 2    | 21  | 41    |
| purple       | 12 | 18   | 17  | 17    |
| red          | 11 | 12.5 | 34  | 46    |
| royalblue    | 2  | 1    | 15  | 19    |
| salmon       | 20 | 5    | 13  | 30    |
| tan          | 6  | 8    | 23  | 21    |
| turquoise    | 14 | 16.5 | 47  | 65    |
| yellow       | 14 | 16.5 | 38  | 50    |

**Supplementary Table S4.** Functional enrichment of genes in significant modules

| Module    | Category | GO Term/Pathway                                              | Gene count | Gene Ratio (%) | P Value  | Fold Enrichment |
|-----------|----------|--------------------------------------------------------------|------------|----------------|----------|-----------------|
| lightcyan | BP       | Cytokine secretion                                           | 3          | 21.43          | 7.09E-03 | 21.62           |
| lightcyan | BP       | Regulation of protein metabolic process                      | 7          | 50.00          | 7.73E-03 | 3.31            |
| lightcyan | BP       | Blood vessel development                                     | 4          | 28.57          | 9.09E-03 | 8.26            |
| lightcyan | BP       | Regulation of cytokine production                            | 4          | 28.57          | 9.13E-03 | 8.24            |
| lightcyan | BP       | Negative regulation of protein transport                     | 3          | 21.43          | 9.59E-03 | 18.49           |
| lightcyan | BP       | Vasculature development                                      | 4          | 28.57          | 1.06E-02 | 7.80            |
| lightcyan | BP       | Negative regulation of establishment of protein localization | 3          | 21.43          | 1.07E-02 | 17.49           |
| lightcyan | BP       | Cytokine production                                          | 4          | 28.57          | 1.17E-02 | 7.54            |
| lightcyan | BP       | Response to growth factor                                    | 4          | 28.57          | 1.18E-02 | 7.50            |
| lightcyan | BP       | Regulation of erk1 and erk2 cascade                          | 3          | 21.43          | 1.56E-02 | 14.33           |
| lightcyan | BP       | Regulation of response to external stimulus                  | 4          | 28.57          | 1.67E-02 | 6.60            |
| lightcyan | BP       | Negative regulation of response to stimulus                  | 5          | 35.71          | 1.78E-02 | 4.34            |
| lightcyan | BP       | Regulation of immune effector process                        | 3          | 21.43          | 2.57E-02 | 10.98           |
| lightcyan | BP       | Extracellular matrix organization                            | 3          | 21.43          | 2.70E-02 | 10.68           |

|           |    |                                                         |    |       |          |        |
|-----------|----|---------------------------------------------------------|----|-------|----------|--------|
| lightcyan | BP | Extracellular structure organization                    | 3  | 21.43 | 2.72E-02 | 10.65  |
| lightcyan | BP | Circulatory system development                          | 4  | 28.57 | 3.40E-02 | 5.03   |
| lightcyan | BP | Cardiovascular system development                       | 4  | 28.57 | 3.40E-02 | 5.03   |
| lightcyan | BP | Positive regulation of cytokine production              | 3  | 21.43 | 3.53E-02 | 9.24   |
| lightcyan | BP | Cell adhesion                                           | 5  | 35.71 | 3.64E-02 | 3.50   |
| lightcyan | BP | Biological adhesion                                     | 5  | 35.71 | 3.68E-02 | 3.49   |
| lightcyan | BP | Macrophage activation                                   | 2  | 14.29 | 3.76E-02 | 48.54  |
| lightcyan | BP | Symbiosis, encompassing mutualism through parasitism    | 4  | 28.57 | 3.91E-02 | 4.77   |
| lightcyan | BP | Interspecies interaction between organisms              | 4  | 28.57 | 3.91E-02 | 4.77   |
| lightcyan | BP | Angiogenesis                                            | 3  | 21.43 | 4.00E-02 | 8.64   |
| lightcyan | BP | Negative regulation of multicellular organismal process | 4  | 28.57 | 4.10E-02 | 4.68   |
| lightcyan | BP | Positive regulation of fibroblast proliferation         | 2  | 14.29 | 4.21E-02 | 43.25  |
| lightcyan | BP | Cellular response to chemical stimulus                  | 6  | 42.86 | 4.28E-02 | 2.69   |
| lightcyan | BP | Negative regulation of transport                        | 3  | 21.43 | 4.67E-02 | 7.93   |
| lightcyan | BP | Regulation of signal transduction                       | 6  | 42.86 | 4.79E-02 | 2.62   |
| lightcyan | BP | Secretion                                               | 4  | 28.57 | 4.97E-02 | 4.33   |
| lightcyan | CC | Extracellular matrix                                    | 6  | 42.86 | 2.17E-05 | 14.74  |
| lightcyan | CC | Extracellular matrix component                          | 4  | 28.57 | 9.19E-05 | 40.68  |
| lightcyan | CC | Proteinaceous extracellular matrix                      | 5  | 35.71 | 9.40E-05 | 18.03  |
| lightcyan | CC | Cytoplasmic, membrane-bounded vesicle                   | 6  | 42.86 | 9.47E-04 | 6.60   |
| lightcyan | CC | Membrane-bounded vesicle                                | 9  | 64.29 | 1.16E-03 | 3.24   |
| lightcyan | CC | Cytoplasmic vesicle                                     | 6  | 42.86 | 1.37E-03 | 6.08   |
| lightcyan | CC | Intracellular vesicle                                   | 6  | 42.86 | 1.38E-03 | 6.07   |
| lightcyan | CC | Vesicle                                                 | 9  | 64.29 | 1.52E-03 | 3.12   |
| lightcyan | CC | Extracellular region part                               | 9  | 64.29 | 1.90E-03 | 3.02   |
| lightcyan | CC | Collagen trimer                                         | 3  | 21.43 | 2.32E-03 | 38.29  |
| lightcyan | CC | Extracellular space                                     | 6  | 42.86 | 2.33E-03 | 5.41   |
| lightcyan | CC | Extracellular region                                    | 9  | 64.29 | 6.20E-03 | 2.53   |
| lightcyan | CC | Endomembrane system                                     | 8  | 57.14 | 9.95E-03 | 2.69   |
| lightcyan | CC | Secretory granule                                       | 3  | 21.43 | 2.60E-02 | 10.91  |
| lightcyan | CC | Secretory vesicle                                       | 3  | 21.43 | 4.24E-02 | 8.36   |
| lightcyan | MF | Collagen binding                                        | 3  | 21.43 | 9.11E-04 | 60.87  |
| lightcyan | MF | Growth factor binding                                   | 3  | 21.43 | 3.58E-03 | 30.43  |
| lightcyan | MF | Transforming growth factor beta binding                 | 2  | 14.29 | 1.13E-02 | 162.32 |
| lightcyan | MF | Calcium ion binding                                     | 4  | 28.57 | 1.26E-02 | 7.24   |
| black     | BP | Immune response                                         | 28 | 16.37 | 2.63E-15 | 7.02   |
| black     | BP | Inflammatory response                                   | 23 | 13.45 | 8.94E-12 | 6.41   |
| black     | BP | Innate immune response                                  | 21 | 12.28 | 4.05E-09 | 5.16   |
| black     | BP | Cell adhesion                                           | 21 | 12.28 | 1.22E-08 | 4.83   |
| black     | BP | Chemokine-mediated signaling pathway                    | 10 | 5.85  | 2.08E-08 | 14.87  |
| black     | BP | Cell chemotaxis                                         | 9  | 5.26  | 1.65E-07 | 14.62  |

|       |    |                                                                 |    |       |          |       |
|-------|----|-----------------------------------------------------------------|----|-------|----------|-------|
| black | BP | Chemotaxis                                                      | 11 | 6.43  | 2.28E-07 | 9.52  |
| black | BP | Adaptive immune response                                        | 11 | 6.43  | 1.37E-06 | 7.85  |
| black | BP | Cell surface receptor signaling pathway                         | 14 | 8.19  | 1.97E-06 | 5.40  |
| black | BP | Leukocyte migration                                             | 10 | 5.85  | 2.27E-06 | 8.66  |
| black | BP | Positive regulation of tumor necrosis factor production         | 7  | 4.09  | 4.93E-06 | 15.73 |
| black | BP | Dendritic cell chemotaxis                                       | 5  | 2.92  | 1.63E-05 | 31.06 |
| black | BP | Extracellular matrix organization                               | 11 | 6.43  | 1.67E-05 | 5.93  |
| black | BP | Neutrophil chemotaxis                                           | 7  | 4.09  | 3.60E-05 | 11.20 |
| black | BP | Regulation of immune response                                   | 10 | 5.85  | 4.77E-05 | 5.93  |
| black | BP | Regulation of cell shape                                        | 9  | 5.26  | 5.37E-05 | 6.79  |
| black | BP | Lymphocyte chemotaxis                                           | 5  | 2.92  | 1.30E-04 | 18.86 |
| black | BP | Response to lipopolysaccharide                                  | 9  | 5.26  | 1.63E-04 | 5.80  |
| black | BP | Defense response to virus                                       | 9  | 5.26  | 1.69E-04 | 5.76  |
| black | BP | T cell differentiation                                          | 5  | 2.92  | 1.71E-04 | 17.60 |
| black | BP | Cellular response to interferon-gamma                           | 6  | 3.51  | 1.95E-04 | 11.12 |
| black | BP | Lipopolysaccharide-mediated signaling pathway                   | 5  | 2.92  | 2.21E-04 | 16.50 |
| black | BP | Positive regulation of erk1 and erk2 cascade                    | 9  | 5.26  | 2.53E-04 | 5.43  |
| black | BP | Regulation of inflammatory response                             | 6  | 3.51  | 3.13E-04 | 10.06 |
| black | BP | Integrin-mediated signaling pathway                             | 7  | 4.09  | 3.44E-04 | 7.47  |
| black | BP | Negative regulation of viral genome replication                 | 5  | 2.92  | 5.30E-04 | 13.20 |
| black | BP | Signal transduction                                             | 24 | 14.04 | 5.44E-04 | 2.18  |
| black | BP | Interferon-gamma-mediated signaling pathway                     | 6  | 3.51  | 5.47E-04 | 8.92  |
| black | BP | Cellular response to interleukin-1                              | 6  | 3.51  | 5.47E-04 | 8.92  |
| black | BP | Cellular response to tumor necrosis factor                      | 7  | 4.09  | 6.04E-04 | 6.72  |
| black | BP | Monocyte chemotaxis                                             | 5  | 2.92  | 6.39E-04 | 12.57 |
| black | BP | Cellular response to lipopolysaccharide                         | 7  | 4.09  | 6.96E-04 | 6.54  |
| black | BP | Positive regulation of tyrosine phosphorylation of stat protein | 3  | 1.75  | 8.64E-04 | 63.37 |
| black | BP | B cell receptor signaling pathway                               | 5  | 2.92  | 1.66E-03 | 9.78  |
| black | BP | Cellular calcium ion homeostasis                                | 6  | 3.51  | 1.85E-03 | 6.81  |
| black | BP | Humoral immune response                                         | 5  | 2.92  | 2.02E-03 | 9.26  |
| black | BP | Positive regulation of t cell proliferation                     | 5  | 2.92  | 2.44E-03 | 8.80  |
| black | BP | Negative regulation of angiogenesis                             | 5  | 2.92  | 2.76E-03 | 8.52  |
| black | BP | Cell-cell signaling                                             | 9  | 5.26  | 2.82E-03 | 3.74  |
| black | BP | Positive regulation of t cell migration                         | 3  | 1.75  | 3.77E-03 | 31.68 |
| black | BP | Immunological synapse formation                                 | 3  | 1.75  | 3.77E-03 | 31.68 |
| black | BP | Positive regulation of i-kappab kinase/nf-kappab signaling      | 7  | 4.09  | 4.20E-03 | 4.59  |
| black | BP | Positive regulation of macrophage chemotaxis                    | 3  | 1.75  | 4.58E-03 | 28.80 |
| black | BP | Platelet activation                                             | 6  | 3.51  | 4.63E-03 | 5.51  |
| black | BP | Positive regulation of inflammatory response                    | 5  | 2.92  | 4.96E-03 | 7.23  |

|       |    |                                                                                           |    |      |          |        |
|-------|----|-------------------------------------------------------------------------------------------|----|------|----------|--------|
| black | BP | Negative regulation of cell adhesion                                                      | 4  | 2.34 | 5.02E-03 | 11.42  |
| black | BP | Response to hypoxia                                                                       | 7  | 4.09 | 5.81E-03 | 4.30   |
| black | BP | Macrophage chemotaxis                                                                     | 3  | 1.75 | 6.41E-03 | 24.37  |
| black | BP | Cytokine-mediated signaling pathway                                                       | 6  | 3.51 | 7.97E-03 | 4.84   |
| black | BP | Positive regulation of interleukin-6 production                                           | 4  | 2.34 | 8.69E-03 | 9.39   |
| black | BP | Positive regulation of interferon-gamma production                                        | 4  | 2.34 | 9.23E-03 | 9.18   |
| black | BP | Skeletal system development                                                               | 6  | 3.51 | 9.57E-03 | 4.63   |
| black | BP | Positive regulation of monocyte chemotaxis                                                | 3  | 1.75 | 9.68E-03 | 19.80  |
| black | BP | Phagocytosis                                                                              | 4  | 2.34 | 1.04E-02 | 8.80   |
| black | BP | Negative regulation of apoptotic process                                                  | 11 | 6.43 | 1.10E-02 | 2.55   |
| black | BP | Defense response to bacterium                                                             | 6  | 3.51 | 1.20E-02 | 4.37   |
| black | BP | Positive regulation of t cell activation                                                  | 3  | 1.75 | 1.22E-02 | 17.60  |
| black | BP | Toll-like receptor 4 signaling pathway                                                    | 3  | 1.75 | 1.22E-02 | 17.60  |
| black | BP | Positive regulation of cell proliferation                                                 | 11 | 6.43 | 1.28E-02 | 2.49   |
| black | BP | Platelet degranulation                                                                    | 5  | 2.92 | 1.63E-02 | 5.13   |
| black | BP | Positive regulation of nf-kappab import into nucleus                                      | 3  | 1.75 | 1.64E-02 | 15.09  |
| black | BP | Response to ethanol                                                                       | 5  | 2.92 | 1.73E-02 | 5.03   |
| black | BP | Cellular response to cytokine stimulus                                                    | 3  | 1.75 | 1.80E-02 | 14.40  |
| black | BP | Positive regulation of neutrophil chemotaxis                                              | 3  | 1.75 | 1.80E-02 | 14.40  |
| black | BP | Positive regulation of interleukin-1 beta secretion                                       | 3  | 1.75 | 1.80E-02 | 14.40  |
| black | BP | Apoptotic process                                                                         | 12 | 7.02 | 1.84E-02 | 2.24   |
| black | BP | Fc receptor mediated stimulatory signaling pathway                                        | 2  | 1.17 | 1.87E-02 | 105.61 |
| black | BP | Positive regulation of hematopoietic stem cell migration                                  | 2  | 1.17 | 1.87E-02 | 105.61 |
| black | BP | Positive regulation of immune complex clearance by monocytes and macrophages              | 2  | 1.17 | 1.87E-02 | 105.61 |
| black | BP | Bundle of his cell to purkinje myocyte communication                                      | 2  | 1.17 | 1.87E-02 | 105.61 |
| black | BP | Osteoclast differentiation                                                                | 3  | 1.75 | 1.96E-02 | 13.78  |
| black | BP | Response to virus                                                                         | 5  | 2.92 | 2.02E-02 | 4.80   |
| black | BP | Cellular defense response                                                                 | 4  | 2.34 | 2.06E-02 | 6.81   |
| black | BP | Collagen catabolic process                                                                | 4  | 2.34 | 2.24E-02 | 6.60   |
| black | BP | G-protein coupled receptor signaling pathway                                              | 16 | 9.36 | 2.24E-02 | 1.88   |
| black | BP | Leukocyte cell-cell adhesion                                                              | 3  | 1.75 | 2.29E-02 | 12.67  |
| black | BP | Positive regulation of angiogenesis                                                       | 5  | 2.92 | 2.33E-02 | 4.59   |
| black | BP | Positive regulation of apoptotic process                                                  | 8  | 4.68 | 2.36E-02 | 2.82   |
| black | BP | Tumor necrosis factor-mediated signaling pathway                                          | 5  | 2.92 | 2.53E-02 | 4.48   |
| black | BP | Toll-like receptor signaling pathway                                                      | 3  | 1.75 | 2.65E-02 | 11.73  |
| black | BP | Negative regulation of cysteine-type endopeptidase activity involved in apoptotic process | 4  | 2.34 | 2.73E-02 | 6.12   |



|       |    |                                                               |    |       |          |       |
|-------|----|---------------------------------------------------------------|----|-------|----------|-------|
| black | BP | Negative regulation of endopeptidase activity                 | 5  | 2.92  | 2.75E-02 | 4.36  |
| black | BP | Myeloid dendritic cell activation involved in immune response | 2  | 1.17  | 2.80E-02 | 70.41 |
| black | BP | Positive regulation of type I hypersensitivity                | 2  | 1.17  | 2.80E-02 | 70.41 |
| black | BP | Cellular response to triacyl bacterial lipopeptide            | 2  | 1.17  | 2.80E-02 | 70.41 |
| black | BP | TLR2 signaling pathway                                        | 2  | 1.17  | 2.80E-02 | 70.41 |
| black | BP | Cellular response to mechanical stimulus                      | 4  | 2.34  | 2.93E-02 | 5.95  |
| black | BP | Positive regulation of phagocytosis                           | 3  | 1.75  | 3.03E-02 | 10.93 |
| black | BP | Cellular response to fibroblast growth factor stimulus        | 3  | 1.75  | 3.22E-02 | 10.56 |
| black | BP | Negative regulation of cell proliferation                     | 9  | 5.26  | 3.39E-02 | 2.40  |
| black | BP | Regulation of heart contraction                               | 3  | 1.75  | 3.42E-02 | 10.22 |
| black | BP | Extracellular matrix disassembly                              | 4  | 2.34  | 3.49E-02 | 5.56  |
| black | BP | Calcium ion transport                                         | 4  | 2.34  | 3.49E-02 | 5.56  |
| black | BP | Brown fat cell differentiation                                | 3  | 1.75  | 3.63E-02 | 9.90  |
| black | BP | JAK-STAT cascade                                              | 3  | 1.75  | 3.63E-02 | 9.90  |
| black | BP | Regulation of vascular endothelial growth factor production   | 2  | 1.17  | 3.71E-02 | 52.81 |
| black | BP | Negative regulation of smooth muscle contraction              | 2  | 1.17  | 3.71E-02 | 52.81 |
| black | BP | Neutrophil activation involved in immune response             | 2  | 1.17  | 3.71E-02 | 52.81 |
| black | BP | T cell costimulation                                          | 4  | 2.34  | 3.72E-02 | 5.42  |
| black | BP | Positive regulation of cytosolic calcium ion concentration    | 5  | 2.92  | 3.79E-02 | 3.94  |
| black | BP | MyD88-dependent toll-like receptor signaling pathway          | 3  | 1.75  | 3.84E-02 | 9.60  |
| black | BP | Negative regulation of T cell mediated cytotoxicity           | 2  | 1.17  | 4.62E-02 | 42.24 |
| black | BP | Regulation of platelet activation                             | 2  | 1.17  | 4.62E-02 | 42.24 |
| black | BP | Interleukin-1 beta production                                 | 2  | 1.17  | 4.62E-02 | 42.24 |
| black | BP | Proteolysis                                                   | 10 | 5.85  | 4.70E-02 | 2.11  |
| black | BP | Movement of cell or subcellular component                     | 4  | 2.34  | 4.75E-02 | 4.91  |
| black | BP | Complement activation                                         | 4  | 2.34  | 4.89E-02 | 4.86  |
| black | CC | Extracellular region                                          | 43 | 25.15 | 1.41E-10 | 2.97  |
| black | CC | Extracellular space                                           | 35 | 20.47 | 2.73E-08 | 2.89  |
| black | CC | Integral component of plasma membrane                         | 33 | 19.30 | 8.92E-07 | 2.59  |
| black | CC | Cell surface                                                  | 18 | 10.53 | 7.53E-06 | 3.69  |
| black | CC | Plasma membrane                                               | 62 | 36.26 | 1.29E-05 | 1.67  |
| black | CC | Extracellular exosome                                         | 45 | 26.32 | 9.95E-05 | 1.78  |
| black | CC | External side of plasma membrane                              | 10 | 5.85  | 1.30E-04 | 5.22  |
| black | CC | Integral component of membrane                                | 63 | 36.84 | 4.50E-03 | 1.36  |
| black | CC | Early endosome                                                | 8  | 4.68  | 4.60E-03 | 3.88  |
| black | CC | Extracellular matrix                                          | 9  | 5.26  | 5.24E-03 | 3.38  |
| black | CC | Focal adhesion                                                | 10 | 5.85  | 8.71E-03 | 2.84  |
| black | CC | Membrane raft                                                 | 7  | 4.09  | 1.06E-02 | 3.78  |

|       |      |                                                                                 |    |       |          |        |
|-------|------|---------------------------------------------------------------------------------|----|-------|----------|--------|
| black | CC   | Platelet alpha granule lumen                                                    | 4  | 2.34  | 1.31E-02 | 8.08   |
| black | CC   | Lysosome                                                                        | 7  | 4.09  | 1.61E-02 | 3.44   |
| black | CC   | Complement component C1 complex                                                 | 2  | 1.17  | 1.78E-02 | 111.12 |
| black | CC   | Actin filament                                                                  | 4  | 2.34  | 2.05E-02 | 6.84   |
| black | CC   | Membrane                                                                        | 30 | 17.54 | 2.05E-02 | 1.52   |
| black | CC   | Proteinaceous extracellular matrix                                              | 7  | 4.09  | 3.36E-02 | 2.90   |
| black | CC   | Basement membrane                                                               | 4  | 2.34  | 3.39E-02 | 5.63   |
| black | CC   | NLRP1 inflammasome complex                                                      | 2  | 1.17  | 3.53E-02 | 55.56  |
| black | CC   | Immunological synapse                                                           | 3  | 1.75  | 3.70E-02 | 9.80   |
| black | CC   | Collagen trimer                                                                 | 4  | 2.34  | 4.95E-02 | 4.83   |
| black | MF   | Chemokine activity                                                              | 8  | 4.68  | 2.61E-07 | 18.01  |
| black | MF   | Heparin binding<br>Transmembrane signaling receptor<br>activity                 | 10 | 5.85  | 1.46E-05 | 6.90   |
| black | MF   | Receptor activity                                                               | 11 | 6.43  | 2.44E-05 | 5.67   |
| black | MF   | Protein homodimerization activity                                               | 10 | 5.85  | 1.56E-04 | 5.08   |
| black | MF   | Cysteine-type endopeptidase activity<br>involved in apoptotic process           | 17 | 9.94  | 9.09E-04 | 2.57   |
| black | MF   | Serine-type endopeptidase activity                                              | 3  | 1.75  | 5.89E-03 | 25.46  |
| black | MF   | Serine-type endopeptidase inhibitor<br>activity                                 | 8  | 4.68  | 8.39E-03 | 3.46   |
| black | MF   | Receptor binding                                                                | 5  | 2.92  | 1.15E-02 | 5.69   |
| black | MF   | Integrin binding                                                                | 9  | 5.26  | 1.47E-02 | 2.81   |
| black | MF   | IgE receptor activity                                                           | 5  | 2.92  | 1.50E-02 | 5.25   |
| black | MF   | Cysteine-type endopeptidase inhibitor<br>activity involved in apoptotic process | 2  | 1.17  | 1.79E-02 | 110.33 |
| black | MF   | CCR chemokine receptor binding                                                  | 3  | 1.75  | 1.80E-02 | 14.39  |
| black | MF   | Cell adhesion molecule binding                                                  | 3  | 1.75  | 1.80E-02 | 14.39  |
| black | MF   | CCR2 chemokine receptor binding                                                 | 4  | 2.34  | 1.84E-02 | 7.12   |
| black | MF   | Actin filament binding                                                          | 2  | 1.17  | 2.68E-02 | 73.56  |
| black | MF   | Carbohydrate binding                                                            | 5  | 2.92  | 3.15E-02 | 4.18   |
| black | MF   | Glycosphingolipid binding                                                       | 6  | 3.51  | 3.23E-02 | 3.38   |
| black | MF   | Deoxycytidine deaminase activity                                                | 2  | 1.17  | 3.55E-02 | 55.17  |
| black | MF   | IgE binding                                                                     | 2  | 1.17  | 4.42E-02 | 55.17  |
| black | KEGG | Pertussis                                                                       | 2  | 1.17  | 4.42E-02 | 44.13  |
| black | KEGG | Staphylococcus aureus infection                                                 | 9  | 5.26  | 3.87E-06 | 9.42   |
| black | KEGG | Fc gamma R-mediated phagocytosis                                                | 8  | 4.68  | 4.31E-06 | 11.63  |
| black | KEGG | Hematopoietic cell lineage                                                      | 9  | 5.26  | 9.12E-06 | 8.41   |
| black | KEGG | Chemokine signaling pathway                                                     | 9  | 5.26  | 9.97E-06 | 8.31   |
| black | KEGG | Cytokine-cytokine receptor interaction                                          | 12 | 7.02  | 1.88E-05 | 5.07   |
| black | KEGG | Cell adhesion molecules (CAMs)                                                  | 13 | 7.60  | 2.70E-05 | 4.44   |
| black | KEGG | Tuberculosis                                                                    | 10 | 5.85  | 6.67E-05 | 5.53   |
| black | KEGG | Phagosome                                                                       | 11 | 6.43  | 6.85E-05 | 4.88   |
| black | KEGG | Malaria                                                                         | 10 | 5.85  | 1.19E-04 | 5.13   |
| black | KEGG | Legionellosis                                                                   | 6  | 3.51  | 3.48E-04 | 9.62   |
| black | KEGG | Leukocyte transendothelial migration                                            | 6  | 3.51  | 5.49E-04 | 8.72   |
| black | KEGG |                                                                                 | 8  | 4.68  | 6.70E-04 | 5.32   |

|        |      |                                                            |    |       |          |        |
|--------|------|------------------------------------------------------------|----|-------|----------|--------|
| black  | KEGG | NF-kappa B signaling pathway                               | 7  | 4.09  | 7.48E-04 | 6.32   |
| black  | KEGG | Rheumatoid arthritis                                       | 7  | 4.09  | 7.95E-04 | 6.25   |
| black  | KEGG | Leishmaniasis                                              | 6  | 3.51  | 1.91E-03 | 6.64   |
| black  | KEGG | TNF signaling pathway                                      | 7  | 4.09  | 2.09E-03 | 5.19   |
| black  | KEGG | Amoebiasis                                                 | 7  | 4.09  | 2.09E-03 | 5.19   |
| black  | KEGG | Focal adhesion                                             | 9  | 5.26  | 4.23E-03 | 3.43   |
| black  | KEGG | ECM-receptor interaction                                   | 6  | 3.51  | 4.64E-03 | 5.42   |
| black  | KEGG | NOD-like receptor signaling pathway                        | 5  | 2.92  | 4.90E-03 | 7.14   |
| black  | KEGG | Prion diseases                                             | 4  | 2.34  | 8.01E-03 | 9.52   |
| black  | KEGG | Primary immunodeficiency                                   | 4  | 2.34  | 8.71E-03 | 9.24   |
| black  | KEGG | Complement and coagulation cascades                        | 5  | 2.92  | 1.09E-02 | 5.69   |
| black  | KEGG | Salmonella infection                                       | 5  | 2.92  | 2.03E-02 | 4.73   |
| black  | KEGG | Influenza A                                                | 7  | 4.09  | 2.20E-02 | 3.16   |
| black  | KEGG | Pathogenic Escherichia coli infection                      | 4  | 2.34  | 2.60E-02 | 6.16   |
| black  | KEGG | Chagas disease (American trypanosomiasis)                  | 5  | 2.92  | 4.17E-02 | 3.78   |
| purple | BP   | Cellular response to nutrient levels                       | 6  | 14.29 | 3.30E-05 | 15.71  |
| purple | BP   | Cellular response to extracellular stimulus                | 6  | 14.29 | 7.34E-05 | 13.28  |
| purple | BP   | Cellular response to external stimulus                     | 6  | 14.29 | 3.16E-04 | 9.72   |
| purple | BP   | Response to nutrient levels                                | 6  | 14.29 | 2.40E-03 | 6.18   |
| purple | BP   | Cellular response to starvation                            | 4  | 9.52  | 2.45E-03 | 14.48  |
| purple | BP   | Response to extracellular stimulus                         | 6  | 14.29 | 3.29E-03 | 5.74   |
| purple | BP   | Protein maturation                                         | 5  | 11.90 | 3.61E-03 | 7.68   |
| purple | BP   | Response to acid chemical                                  | 5  | 11.90 | 3.95E-03 | 7.49   |
| purple | BP   | Response to starvation                                     | 4  | 9.52  | 5.46E-03 | 10.88  |
| purple | BP   | Renal sodium ion absorption                                | 2  | 4.76  | 9.34E-03 | 208.13 |
| purple | BP   | Female pregnancy                                           | 4  | 9.52  | 9.47E-03 | 8.90   |
| purple | BP   | Response to organic substance                              | 14 | 33.33 | 9.58E-03 | 2.07   |
| purple | BP   | Renal sodium ion transport                                 | 2  | 4.76  | 1.17E-02 | 166.50 |
| purple | BP   | Multi-multicellular organism process                       | 4  | 9.52  | 1.38E-02 | 7.74   |
| purple | BP   | Proteolysis                                                | 10 | 23.81 | 1.45E-02 | 2.46   |
| purple | BP   | Protein processing                                         | 4  | 9.52  | 1.77E-02 | 7.06   |
| purple | BP   | Proteolysis involved in cellular protein catabolic process | 6  | 14.29 | 1.79E-02 | 3.80   |
| purple | BP   | Cellular protein catabolic process                         | 6  | 14.29 | 2.15E-02 | 3.62   |
| purple | BP   | Pyrimidine-containing compound salvage                     | 2  | 4.76  | 2.78E-02 | 69.38  |
| purple | BP   | Pyrimidine nucleoside salvage                              | 2  | 4.76  | 2.78E-02 | 69.38  |
| purple | BP   | Protein autoprocessing                                     | 2  | 4.76  | 3.00E-02 | 64.04  |
| purple | BP   | Cellular catabolic process                                 | 9  | 21.43 | 3.12E-02 | 2.32   |
| purple | BP   | Homeostatic process                                        | 9  | 21.43 | 3.42E-02 | 2.28   |
| purple | BP   | Renal absorption                                           | 2  | 4.76  | 3.46E-02 | 55.50  |
| purple | BP   | Hemoglobin metabolic process                               | 2  | 4.76  | 3.46E-02 | 55.50  |
| purple | BP   | Nucleoside biosynthetic process                            | 3  | 7.14  | 3.66E-02 | 9.68   |
| purple | BP   | Glycosyl compound biosynthetic process                     | 3  | 7.14  | 3.77E-02 | 9.53   |

|        |    |                                                        |    |       |          |       |
|--------|----|--------------------------------------------------------|----|-------|----------|-------|
| purple | BP | Nucleoside salvage                                     | 2  | 4.76  | 3.91E-02 | 48.97 |
| purple | BP | Protein catabolic process                              | 6  | 14.29 | 3.96E-02 | 3.08  |
| purple | BP | Protein stabilization                                  | 3  | 7.14  | 4.03E-02 | 9.18  |
| purple | BP | Establishment of mitochondrion localization            | 2  | 4.76  | 4.14E-02 | 46.25 |
| purple | BP | Positive regulation of protein processing              | 2  | 4.76  | 4.36E-02 | 43.82 |
| purple | BP | Innate immune response                                 | 6  | 14.29 | 4.42E-02 | 2.99  |
| purple | BP | Ubiquitin-dependent protein catabolic process          | 5  | 11.90 | 4.51E-02 | 3.61  |
| purple | BP | Protein activation cascade                             | 3  | 7.14  | 4.58E-02 | 8.55  |
| purple | BP | Positive regulation of protein maturation              | 2  | 4.76  | 4.58E-02 | 41.63 |
| purple | BP | Myeloid cell differentiation                           | 4  | 9.52  | 4.59E-02 | 4.85  |
| purple | BP | Response to external stimulus                          | 10 | 23.81 | 4.67E-02 | 2.01  |
| purple | BP | Modification-dependent protein catabolic process       | 5  | 11.90 | 4.70E-02 | 3.56  |
| purple | BP | Pyrimidine nucleoside catabolic process                | 2  | 4.76  | 4.81E-02 | 39.64 |
| purple | BP | Inclusion body assembly                                | 2  | 4.76  | 4.81E-02 | 39.64 |
| purple | BP | Response to lipid                                      | 6  | 14.29 | 4.89E-02 | 2.90  |
| purple | BP | Modification-dependent macromolecule catabolic process | 5  | 11.90 | 4.90E-02 | 3.51  |
| purple | CC | Extracellular space                                    | 11 | 26.19 | 4.79E-03 | 2.70  |
| purple | CC | Membrane-bounded vesicle                               | 17 | 40.48 | 2.48E-02 | 1.67  |
| purple | CC | Hemoglobin complex                                     | 2  | 4.76  | 3.26E-02 | 59.05 |
| purple | CC | Schmidt-Lanterman incisure                             | 2  | 4.76  | 3.26E-02 | 59.05 |
| purple | CC | Extracellular exosome                                  | 14 | 33.33 | 3.38E-02 | 1.76  |
| purple | CC | Extracellular vesicle                                  | 14 | 33.33 | 3.51E-02 | 1.76  |
| purple | CC | Extracellular organelle                                | 14 | 33.33 | 3.52E-02 | 1.76  |
| purple | CC | Compact myelin                                         | 2  | 4.76  | 4.32E-02 | 44.29 |
| purple | CC | Apicolateral plasma membrane                           | 2  | 4.76  | 4.58E-02 | 41.68 |
| purple | MF | Misfolded protein binding                              | 2  | 4.76  | 2.81E-02 | 68.62 |
| purple | MF | Hydrolase activity                                     | 12 | 28.57 | 3.57E-02 | 1.90  |
| purple | MF | Catalytic activity                                     | 21 | 50.00 | 4.37E-02 | 1.44  |

**Supplementary Table S5.** DEGs identified in mouse diabetic nephropathy

| RefSeq<br>Accession | Gene<br>Symbol | GenBank<br>ID | D - C (GSE20636) |           | GD - GC (GSE33744) |           |
|---------------------|----------------|---------------|------------------|-----------|--------------------|-----------|
|                     |                |               | logFC            | adj.P.Val | logFC              | adj.P.Val |
| NM_001012335        | Mdk            | 17242         | -1.05            | 1.41E-14  | -1.28              | 9.88E-13  |
| NM_001012336        | Mdk            | 17242         | -1.05            | 1.41E-14  | -1.28              | 9.88E-13  |
| NM_001012766        | Ear12          | 503845        | 0.71             | 3.72E-04  | 1.24               | 2.48E-05  |
| NM_001025610        | Ms4a7          | 109225        | 0.97             | 2.43E-06  | 1.35               | 4.29E-06  |
| NM_001029937        | Sec14l3        | 380683        | -1.58            | 2.15E-10  | -1.60              | 1.11E-09  |
| NM_001034910        | Defb42         | 619548        | 0.61             | 9.33E-05  | 0.92               | 9.10E-05  |
| NM_001039150        | Cd44           | 12505         | 0.84             | 6.71E-05  | 1.04               | 4.71E-06  |
| NM_001039151        | Cd44           | 12505         | 0.84             | 6.71E-05  | 1.04               | 4.71E-06  |
| NM_001044384        | Timp1          | 21857         | 0.62             | 1.51E-04  | 0.91               | 3.84E-03  |

|              |          |        |       |          |       |          |
|--------------|----------|--------|-------|----------|-------|----------|
| NM_001111048 | Fga      | 14161  | 0.59  | 5.89E-04 | 0.92  | 1.45E-03 |
| NM_001111099 | Cdkn1a   | 12575  | 1.02  | 1.48E-10 | 1.40  | 7.89E-16 |
| NM_001145899 | Slc15a2  | 57738  | -0.64 | 1.44E-15 | -0.83 | 2.19E-06 |
| NM_001159986 | Sec16b   | 89867  | 0.71  | 8.09E-11 | 0.83  | 1.83E-08 |
| NM_001161432 | Eda2r    | 245527 | 0.64  | 1.54E-07 | 1.02  | 5.90E-10 |
| NM_001164357 | Slc25a25 | 227731 | 0.60  | 8.91E-04 | 0.71  | 5.19E-06 |
| NM_001164358 | Slc25a25 | 227731 | 0.60  | 8.91E-04 | 0.71  | 5.19E-06 |
| NM_001166631 | Havcr1   | 171283 | 0.98  | 7.29E-05 | 1.43  | 1.68E-04 |
| NM_001166632 | Havcr1   | 171283 | 0.98  | 7.29E-05 | 1.43  | 1.68E-04 |
| NM_001177785 | Cd44     | 12505  | 0.84  | 6.71E-05 | 1.04  | 4.71E-06 |
| NM_001177786 | Cd44     | 12505  | 0.84  | 6.71E-05 | 1.04  | 4.71E-06 |
| NM_001177787 | Cd44     | 12505  | 0.84  | 6.71E-05 | 1.04  | 4.71E-06 |
| NM_001199217 | Slc38a3  | 76257  | 0.77  | 1.49E-08 | 0.87  | 1.97E-06 |
| NM_001199218 | Slc38a3  | 76257  | 0.77  | 1.49E-08 | 0.87  | 1.97E-06 |
| NM_001204134 | C1qtnf3  | 81799  | -0.97 | 1.23E-11 | -1.68 | 4.91E-11 |
| NM_001204931 | Reep6    | 70335  | 1.09  | 7.47E-10 | 0.83  | 5.12E-06 |
| NM_001252330 | Slc6a15  | 103098 | -0.89 | 3.42E-11 | -1.18 | 3.74E-11 |
| NM_001253781 | Prlr     | 19116  | -1.13 | 6.00E-10 | 0.83  | 3.66E-06 |
| NM_001276398 | Ms4a7    | 109225 | 0.88  | 2.33E-05 | 1.35  | 4.96E-06 |
| NM_001281830 | Ifi2712a | 76933  | 0.73  | 3.59E-03 | 1.10  | 1.83E-03 |
| NM_001290273 |          | 66112  | 0.97  | 1.02E-07 | 1.52  | 2.61E-06 |
| NM_001290558 | Slc25a25 | 227731 | 0.60  | 8.91E-04 | 0.71  | 5.19E-06 |
| NM_001291058 | Cd68     | 12514  | 0.78  | 3.06E-06 | 1.22  | 1.48E-07 |
| NM_001291481 | Mdk      | 17242  | -1.05 | 1.41E-14 | -1.28 | 9.88E-13 |
| NM_001291482 | Mdk      | 17242  | -1.05 | 1.41E-14 | -1.28 | 9.88E-13 |
| NM_001291483 | Mdk      | 17242  | -0.83 | 1.49E-11 | -1.22 | 5.08E-12 |
| NM_001294280 | Timp1    | 21857  | 0.59  | 7.62E-04 | 0.92  | 3.42E-03 |
| NM_001311132 | Akr1c20  | 116852 | -0.89 | 3.89E-10 | 0.69  | 2.65E-03 |
| NM_001313963 | Krt19    | 16669  | 0.67  | 7.78E-05 | 1.38  | 1.34E-06 |
| NM_001320076 | Mmp12    | 17381  | 0.64  | 6.98E-05 | 1.30  | 2.07E-04 |
| NM_001320077 | Mmp12    | 17381  | 0.64  | 6.98E-05 | 1.30  | 2.07E-04 |
| NM_001347354 | #N/A     | #N/A   | -0.67 | 6.64E-06 | -1.68 | 7.61E-11 |
| NM_007498    | Atf3     | 11910  | 0.69  | 5.19E-05 | 0.65  | 3.26E-04 |
| NM_007669    | Cdkn1a   | 12575  | 1.02  | 1.48E-10 | 1.40  | 7.89E-16 |
| NM_008176    | Cxcl1    | 14825  | 0.80  | 1.38E-04 | 1.20  | 2.23E-04 |
| NM_008256    | Hmgcs2   | 15360  | 1.41  | 5.91E-05 | 1.74  | 1.81E-10 |
| NM_008331    | Ifit1    | 15957  | 0.67  | 7.96E-05 | 0.77  | 2.33E-03 |
| NM_008471    | Krt19    | 16669  | 0.67  | 7.78E-05 | 1.38  | 1.34E-06 |
| NM_008491    | Lcn2     | 16819  | 2.03  | 1.02E-08 | 3.20  | 3.53E-09 |
| NM_008586    | Mep1b    | 17288  | -0.68 | 5.41E-09 | -1.47 | 3.83E-06 |
| NM_008605    | Mmp12    | 17381  | 0.64  | 6.98E-05 | 1.30  | 2.07E-04 |
| NM_008630    | Mt2      | 17750  | 0.90  | 8.02E-07 | 0.65  | 2.58E-09 |
| NM_008871    | Serpine1 | 18787  | 0.73  | 9.44E-05 | 0.95  | 1.02E-08 |
| NM_009139    | Ccl6     | 20305  | 0.63  | 7.23E-05 | 1.31  | 2.13E-08 |

|           |          |        |       |          |       |          |
|-----------|----------|--------|-------|----------|-------|----------|
| NM_009264 | Sprr1a   | 20753  | 0.72  | 3.60E-04 | 0.98  | 4.68E-03 |
| NM_009381 | Thrsp    | 21835  | -0.93 | 5.24E-04 | 0.76  | 4.21E-07 |
| NM_009627 | Adm      | 11535  | 0.69  | 4.38E-07 | 0.90  | 5.13E-10 |
| NM_009778 | C3       | 12266  | 1.91  | 1.92E-12 | 1.40  | 1.45E-06 |
| NM_009827 | Cckar    | 12425  | -0.67 | 6.64E-06 | -1.68 | 7.61E-11 |
| NM_009851 | Cd44     | 12505  | 0.84  | 6.71E-05 | 1.04  | 4.71E-06 |
| NM_009899 | Clca3a1  | 12722  | 0.70  | 2.05E-06 | 1.53  | 5.85E-12 |
| NM_010006 | Cyp2d9   | 13105  | 0.61  | 7.57E-04 | -0.78 | 4.74E-03 |
| NM_010493 | Icam1    | 15894  | 0.60  | 3.35E-06 | 0.60  | 5.95E-07 |
| NM_010594 | Kap      | 16483  | -0.83 | 4.61E-04 | -1.32 | 1.34E-07 |
| NM_010784 | Mdk      | 17242  | -1.05 | 1.41E-14 | -1.28 | 9.88E-13 |
| NM_011076 | Abcb1a   | 18671  | -0.60 | 5.93E-07 | 0.82  | 2.83E-07 |
| NM_011169 | Prlr     | 19116  | -1.01 | 5.96E-11 | 0.76  | 4.75E-05 |
| NM_011311 | S100a4   | 20198  | 0.69  | 5.42E-08 | 0.82  | 1.07E-07 |
| NM_011333 | Ccl2     | 20296  | 0.68  | 9.82E-06 | 0.91  | 4.32E-04 |
| NM_011338 | Ccl9     | 20308  | 0.70  | 2.83E-05 | 1.16  | 6.60E-08 |
| NM_011414 | Slpi     | 20568  | 0.73  | 8.64E-05 | 2.23  | 7.83E-11 |
| NM_011593 | Timp1    | 21857  | 0.62  | 1.51E-04 | 0.91  | 3.84E-03 |
| NM_011671 | Ucp2     | 22228  | 0.91  | 1.58E-09 | 0.94  | 3.59E-11 |
| NM_011825 | Grem2    | 23893  | 0.74  | 2.56E-03 | 0.60  | 3.67E-03 |
| NM_013468 | Ankrd1   | 107765 | 0.97  | 3.05E-10 | 1.10  | 1.91E-09 |
| NM_013602 | Mt1      | 17748  | 0.62  | 6.36E-07 | 0.59  | 3.19E-10 |
| NM_013697 | Ttr      | 22139  | -0.96 | 2.04E-04 | -1.38 | 1.44E-02 |
| NM_013750 | Phlda3   | 27280  | 0.61  | 8.02E-11 | 0.78  | 3.98E-10 |
| NM_017372 | Lyz2     | 17105  | 1.06  | 2.18E-06 | 0.94  | 7.98E-07 |
| NM_017388 | Ear3     | 53876  | 0.82  | 4.96E-05 | 1.46  | 8.00E-08 |
| NM_018816 | Apom     | 55938  | -0.73 | 3.64E-10 | -0.68 | 1.59E-04 |
| NM_020581 | Angptl4  | 57875  | 1.15  | 6.19E-04 | 1.41  | 1.16E-09 |
| NM_021274 | Cxcl10   | 15945  | 0.97  | 1.58E-06 | 0.83  | 1.27E-04 |
| NM_022018 | Fam129a  | 63913  | 0.61  | 7.06E-05 | 1.09  | 5.69E-10 |
| NM_023256 | Krt20    | 66809  | 0.79  | 7.50E-06 | 1.14  | 6.49E-05 |
| NM_023805 | Slc38a3  | 76257  | 0.77  | 1.49E-08 | 0.87  | 1.97E-06 |
| NM_025684 | Nepn     | 66650  | -0.70 | 9.45E-08 | -0.74 | 2.18E-04 |
| NM_027211 | Anxa13   | 69787  | -1.55 | 6.80E-15 | -1.75 | 2.33E-14 |
| NM_027762 | Tchhl1   | 71325  | 0.72  | 1.34E-07 | 0.66  | 5.69E-03 |
| NM_027836 | Ms4a7    | 109225 | 0.88  | 2.33E-05 | 1.35  | 4.96E-06 |
| NM_029083 | Ddit4    | 74747  | 0.67  | 1.00E-04 | 0.60  | 5.70E-06 |
| NM_029662 | Mfsd2a   | 76574  | -0.81 | 6.74E-07 | -1.29 | 1.27E-05 |
| NM_029796 | Lrg1     | 76905  | 0.69  | 1.87E-04 | 1.34  | 1.94E-09 |
| NM_029803 | Ifi27l2a | 76933  | 0.76  | 4.86E-03 | 0.99  | 2.33E-03 |
| NM_030888 | C1qtnf3  | 81799  | -0.97 | 1.23E-11 | -1.68 | 4.91E-11 |
| NM_033354 | Sec16b   | 89867  | 0.71  | 8.09E-11 | 0.83  | 1.83E-08 |
| NM_053215 | Ugt2b37  | 112417 | 0.59  | 1.17E-04 | -1.22 | 2.24E-08 |
| NM_080845 | Ftcd     | 14317  | 0.62  | 7.99E-10 | 0.68  | 2.02E-03 |

|              |          |        |       |          |       |          |
|--------------|----------|--------|-------|----------|-------|----------|
| NM_133888    | Smpdl3b  | 100340 | 0.95  | 1.17E-07 | 1.14  | 4.89E-08 |
| NM_134248    | Havcr1   | 171283 | 0.98  | 7.29E-05 | 1.43  | 1.68E-04 |
| NM_138685    | Wfdc15b  | 192201 | -0.71 | 9.78E-12 | -0.59 | 5.31E-05 |
| NM_139292    | Reep6    | 70335  | 1.09  | 7.47E-10 | 0.83  | 5.12E-06 |
| NM_144785    | Slc22a19 | 207151 | -0.59 | 4.05E-08 | -1.77 | 1.08E-07 |
| NM_144856    | Slc22a7  | 108114 | -0.80 | 1.71E-08 | -3.17 | 3.55E-14 |
| NM_145424    | BC089597 | 216454 | -0.60 | 1.26E-09 | 0.83  | 6.71E-05 |
| NM_146118    | Slc25a25 | 227731 | 0.60  | 8.91E-04 | 0.71  | 5.19E-06 |
| NM_172840    | Vwa2     | 240675 | -0.74 | 2.96E-11 | -0.68 | 6.84E-07 |
| NM_175158    | Utp20    | 70683  | 0.94  | 1.11E-07 | 0.60  | 3.02E-09 |
| NM_175328    | Slc6a15  | 103098 | -0.89 | 3.42E-11 | -1.18 | 3.74E-11 |
| NM_175540    | Eda2r    | 245527 | 0.64  | 1.54E-07 | 1.02  | 5.90E-10 |
| NM_177406    | Cyp4a12a | 277753 | 1.48  | 6.14E-10 | -1.27 | 2.97E-09 |
| NM_201360    | Cyp2d12  | 380997 | -0.97 | 6.37E-06 | -1.39 | 7.14E-10 |
| NR_027641    | Sec16b   | 89867  | 0.71  | 8.09E-11 | 0.83  | 1.83E-08 |
| NR_110993    | Cd68     | 12514  | 0.78  | 3.06E-06 | 1.22  | 1.48E-07 |
| NR_130895    | Clca3a1  | 12722  | 0.70  | 2.05E-06 | 1.53  | 5.85E-12 |
| XM_006496826 | Grem2    | 23893  | 0.74  | 2.56E-03 | 0.60  | 3.67E-03 |
| XM_006497049 | Sec16b   | 89867  | 0.71  | 8.09E-11 | 0.83  | 1.83E-08 |
| XM_006497954 | Slc25a25 | 227731 | 0.60  | 8.91E-04 | 0.71  | 5.19E-06 |
| XM_006497955 | Slc25a25 | 227731 | 0.60  | 8.91E-04 | 0.71  | 5.19E-06 |
| XM_006497957 | Slc25a25 | 227731 | 0.60  | 8.91E-04 | 0.71  | 5.19E-06 |
| XM_006497958 | Slc25a25 | 227731 | 0.60  | 8.91E-04 | 0.71  | 5.19E-06 |
| XM_006498645 | Cd44     | 12505  | 0.84  | 6.71E-05 | 1.04  | 4.71E-06 |
| XM_006498646 | Cd44     | 12505  | 0.84  | 6.71E-05 | 1.04  | 4.71E-06 |
| XM_006498647 | Cd44     | 12505  | 0.84  | 6.71E-05 | 1.04  | 4.71E-06 |
| XM_006498649 | Cd44     | 12505  | 0.84  | 6.71E-05 | 1.04  | 4.71E-06 |
| XM_006501177 | S100a4   | 20198  | 0.69  | 5.42E-08 | 0.82  | 1.07E-07 |
| XM_006501178 | S100a4   | 20198  | 0.69  | 5.42E-08 | 0.82  | 1.07E-07 |
| XM_006503477 | Mfsd2a   | 76574  | -0.81 | 6.74E-07 | -1.29 | 1.27E-05 |
| XM_006503555 | Abcb1a   | 18671  | -0.60 | 5.93E-07 | 0.82  | 2.83E-07 |
| XM_006503556 | Abcb1a   | 18671  | -0.60 | 5.93E-07 | 0.82  | 2.83E-07 |
| XM_006507579 | Ucp2     | 22228  | 0.91  | 1.58E-09 | 0.94  | 3.59E-11 |
| XM_006512818 | Nepn     | 66650  | -0.70 | 9.45E-08 | -0.74 | 2.18E-04 |
| XM_006512819 | Nepn     | 66650  | -0.70 | 9.45E-08 | -0.74 | 2.18E-04 |
| XM_006512982 | Slc6a15  | 103098 | -0.87 | 6.35E-11 | -1.15 | 2.05E-10 |
| XM_006512983 | Slc6a15  | 103098 | -0.87 | 6.35E-11 | -1.15 | 2.05E-10 |
| XM_006512984 | Slc6a15  | 103098 | -0.87 | 6.35E-11 | -1.15 | 2.05E-10 |
| XM_006513215 | Ftcd     | 14317  | 0.62  | 7.99E-10 | 0.68  | 2.02E-03 |
| XM_006513216 | Ftcd     | 14317  | 0.62  | 7.99E-10 | 0.68  | 2.02E-03 |
| XM_006514077 | Reep6    | 70335  | 1.09  | 7.47E-10 | 0.83  | 5.12E-06 |
| XM_006516465 | Akr1c20  | 116852 | -0.89 | 3.89E-10 | 0.69  | 2.65E-03 |
| XM_006516466 | Akr1c20  | 116852 | -0.89 | 3.89E-10 | 0.69  | 2.65E-03 |
| XM_006520034 | Prlr     | 19116  | -1.01 | 5.96E-11 | 0.76  | 4.75E-05 |

|              |          |        |       |          |       |          |
|--------------|----------|--------|-------|----------|-------|----------|
| XM_006520035 | Prlr     | 19116  | -1.01 | 5.96E-11 | 0.76  | 4.75E-05 |
| XM_006520036 | Prlr     | 19116  | -1.01 | 5.96E-11 | 0.76  | 4.75E-05 |
| XM_006520037 | Prlr     | 19116  | -1.01 | 5.96E-11 | 0.76  | 4.75E-05 |
| XM_006521128 | Cyp2d12  | 380997 | -0.97 | 6.37E-06 | -1.39 | 7.14E-10 |
| XM_006521129 | Cyp2d12  | 380997 | -0.97 | 6.37E-06 | -1.39 | 7.14E-10 |
| XM_006521130 | Cyp2d12  | 380997 | -0.97 | 6.37E-06 | -1.39 | 7.14E-10 |
| XM_006521131 | Cyp2d12  | 380997 | -0.97 | 6.37E-06 | -1.39 | 7.14E-10 |
| XM_006521132 | Cyp2d12  | 380997 | -0.97 | 6.37E-06 | -1.39 | 7.14E-10 |
| XM_006526814 | Slc22a19 | 207151 | -0.59 | 4.05E-08 | -1.77 | 1.08E-07 |
| XM_006527090 | Vwa2     | 240675 | -0.74 | 2.96E-11 | -0.68 | 6.84E-07 |
| XM_006527091 | Vwa2     | 240675 | -0.74 | 2.96E-11 | -0.68 | 6.84E-07 |
| XM_006528025 | Eda2r    | 245527 | 0.64  | 1.54E-07 | 1.02  | 5.90E-10 |
| XM_006528026 | Eda2r    | 245527 | 0.64  | 1.54E-07 | 1.02  | 5.90E-10 |
| XM_006530752 | Mt1      | 17748  | 0.62  | 4.45E-07 | 0.76  | 6.32E-11 |
| XM_006532392 | Havcr1   | 171283 | 0.97  | 7.65E-05 | 1.45  | 2.03E-04 |
| XM_006532393 | Havcr1   | 171283 | 0.98  | 7.29E-05 | 1.43  | 1.68E-04 |
| XM_011239335 | Mdk      | 17242  | -1.05 | 1.41E-14 | -1.28 | 9.88E-13 |
| XM_011240004 | Clca3a1  | 12722  | 0.70  | 2.05E-06 | 1.53  | 5.85E-12 |
| XM_011243730 | Sec14l3  | 380683 | -1.52 | 2.71E-10 | -1.60 | 1.62E-09 |
| XM_011246258 | C3       | 12266  | 1.91  | 1.92E-12 | 1.40  | 1.45E-06 |
| XM_011248783 | Havcr1   | 171283 | 0.97  | 7.65E-05 | 1.45  | 2.03E-04 |
| XM_011248784 | Havcr1   | 171283 | 0.97  | 7.65E-05 | 1.45  | 2.03E-04 |
| XM_017312983 | Sec16b   | 89867  | 0.71  | 8.09E-11 | 0.83  | 1.83E-08 |
| XM_017312984 | Sec16b   | 89867  | 0.71  | 8.09E-11 | 0.83  | 1.83E-08 |
| XM_017313160 | Mmp12    | 17381  | 0.64  | 6.98E-05 | 1.30  | 2.07E-04 |
| XM_017313682 | Slc38a3  | 76257  | 0.77  | 1.49E-08 | 0.87  | 1.97E-06 |
| XM_017318188 | Slc22a26 | 236149 | -1.26 | 6.41E-07 | -0.97 | 3.33E-06 |
| XM_017320448 | Grem2    | 23893  | 0.74  | 2.56E-03 | 0.60  | 3.67E-03 |
| XR_383836    | C1qtnf3  | 81799  | -0.97 | 1.23E-11 | -1.68 | 4.91E-11 |
| XR_871103    | Slc38a3  | 76257  | 0.77  | 1.49E-08 | 0.87  | 1.97E-06 |
| XR_875302    | Cyp2d12  | 380997 | -0.97 | 6.37E-06 | -1.39 | 7.14E-10 |

**Supplementary Table S6.** Functional enrichment of DEGs identified in human diabetic nephropathy

| Category | GO Term/Pathway                     | Gene count | Gene Ratio (%) | P Value  | Fold Enrichment |
|----------|-------------------------------------|------------|----------------|----------|-----------------|
| BP       | Defense response                    | 49         | 38.28          | 3.04E-20 | 4.52            |
| BP       | Immune response                     | 47         | 36.72          | 3.24E-18 | 4.24            |
| BP       | Immune system process               | 57         | 44.53          | 2.75E-17 | 3.24            |
| BP       | Innate immune response              | 32         | 25.00          | 1.31E-14 | 5.36            |
| BP       | Regulation of immune system process | 39         | 30.47          | 8.77E-14 | 3.96            |
| BP       | Cell activation                     | 32         | 25.00          | 1.29E-13 | 4.92            |



|    |                                              |    |       |          |       |
|----|----------------------------------------------|----|-------|----------|-------|
| BP | Regulation of immune response                | 32 | 25.00 | 1.37E-13 | 4.91  |
| BP | Response to stress                           | 63 | 49.22 | 4.52E-13 | 2.40  |
| BP | Positive regulation of immune system process | 32 | 25.00 | 5.32E-13 | 4.66  |
| BP | Immune effector process                      | 28 | 21.88 | 1.45E-12 | 5.28  |
| BP | Leukocyte activation                         | 28 | 21.88 | 1.70E-12 | 5.25  |
| BP | Positive regulation of immune response       | 26 | 20.31 | 1.03E-11 | 5.32  |
| BP | Response to external stimulus                | 44 | 34.38 | 1.99E-11 | 2.97  |
| BP | Inflammatory response                        | 24 | 18.75 | 9.97E-11 | 5.27  |
| BP | Adaptive immune response                     | 20 | 15.63 | 1.21E-10 | 6.66  |
| BP | Regulation of response to external stimulus  | 25 | 19.53 | 1.94E-10 | 4.85  |
| BP | Leukocyte cell-cell adhesion                 | 21 | 16.41 | 2.40E-10 | 5.98  |
| BP | Humoral immune response                      | 16 | 12.50 | 2.40E-10 | 9.03  |
| BP | Biological adhesion                          | 38 | 29.69 | 2.49E-10 | 3.12  |
| BP | Activation of immune response                | 22 | 17.19 | 2.64E-10 | 5.60  |
| BP | Positive regulation of response to stimulus  | 41 | 32.03 | 6.47E-10 | 2.83  |
| BP | Cell adhesion                                | 37 | 28.91 | 9.16E-10 | 3.05  |
| BP | T cell aggregation                           | 19 | 14.84 | 2.41E-09 | 5.96  |
| BP | T cell activation                            | 19 | 14.84 | 2.41E-09 | 5.96  |
| BP | Lymphocyte aggregation                       | 19 | 14.84 | 2.50E-09 | 5.95  |
| BP | Response to other organism                   | 25 | 19.53 | 3.16E-09 | 4.22  |
| BP | Response to external biotic stimulus         | 25 | 19.53 | 3.16E-09 | 4.22  |
| BP | Leukocyte aggregation                        | 19 | 14.84 | 3.19E-09 | 5.86  |
| BP | Lymphocyte activation                        | 22 | 17.19 | 4.35E-09 | 4.79  |
| BP | Single organism cell adhesion                | 24 | 18.75 | 4.91E-09 | 4.31  |
| BP | Response to stimulus                         | 91 | 71.09 | 5.03E-09 | 1.53  |
| BP | Single organismal cell-cell adhesion         | 23 | 17.97 | 6.80E-09 | 4.44  |
| BP | Myeloid leukocyte activation                 | 12 | 9.38  | 7.46E-09 | 11.42 |
| BP | Response to biotic stimulus                  | 25 | 19.53 | 8.66E-09 | 4.01  |
| BP | Leukocyte migration                          | 17 | 13.28 | 9.60E-09 | 6.33  |
| BP | Regulation of response to stimulus           | 54 | 42.19 | 1.93E-08 | 2.08  |

|    |                                                                                                                                                                    |    |       |          |       |
|----|--------------------------------------------------------------------------------------------------------------------------------------------------------------------|----|-------|----------|-------|
| BP | Leukocyte mediated immunity                                                                                                                                        | 16 | 12.50 | 3.29E-08 | 6.29  |
| BP | Positive regulation of leukocyte activation                                                                                                                        | 15 | 11.72 | 4.30E-08 | 6.75  |
| BP | Positive regulation of biological process                                                                                                                          | 67 | 52.34 | 4.86E-08 | 1.77  |
| BP | Acute inflammatory response                                                                                                                                        | 11 | 8.59  | 5.03E-08 | 11.15 |
| BP | Positive regulation of cell activation                                                                                                                             | 15 | 11.72 | 6.13E-08 | 6.56  |
| BP | Regulation of response to stress                                                                                                                                   | 29 | 22.66 | 6.25E-08 | 3.16  |
| BP | Response to organic substance                                                                                                                                      | 45 | 35.16 | 9.46E-08 | 2.23  |
| BP | Lymphocyte mediated immunity<br>Adaptive immune response based on<br>somatic recombination of immune receptors<br>built from immunoglobulin superfamily<br>domains | 14 | 10.94 | 1.16E-07 | 6.87  |
| BP | Complement activation                                                                                                                                              | 14 | 10.94 | 1.21E-07 | 6.85  |
| BP | Regulation of defense response                                                                                                                                     | 10 | 7.81  | 1.44E-07 | 11.96 |
| BP | Regulation of inflammatory response                                                                                                                                | 20 | 15.63 | 2.72E-07 | 4.14  |
| BP | Response to molecule of bacterial origin                                                                                                                           | 14 | 10.94 | 3.53E-07 | 6.24  |
| BP | Cell-cell adhesion                                                                                                                                                 | 14 | 10.94 | 3.79E-07 | 6.20  |
| BP | Regulation of cell activation                                                                                                                                      | 26 | 20.31 | 4.86E-07 | 3.13  |
| BP | Regulation of immune effector process                                                                                                                              | 17 | 13.28 | 4.93E-07 | 4.75  |
| BP | Positive regulation of multicellular<br>organismal process                                                                                                         | 14 | 10.94 | 5.21E-07 | 6.03  |
| BP | Regulation of cytokine production                                                                                                                                  | 29 | 22.66 | 5.77E-07 | 2.84  |
| BP | Positive regulation of cellular process                                                                                                                            | 18 | 14.06 | 6.47E-07 | 4.37  |
| BP | Regulation of acute inflammatory response                                                                                                                          | 60 | 46.88 | 6.53E-07 | 1.77  |
| BP | Positive regulation of lymphocyte activation                                                                                                                       | 8  | 6.25  | 9.13E-07 | 15.13 |
| BP | Protein activation cascade                                                                                                                                         | 13 | 10.16 | 9.21E-07 | 6.34  |
| BP | Regulation of leukocyte activation                                                                                                                                 | 10 | 7.81  | 9.52E-07 | 9.58  |
| BP | Cellular response to chemical stimulus                                                                                                                             | 16 | 12.50 | 1.11E-06 | 4.78  |
| BP | Regulation of lymphocyte activation<br>Humoral immune response mediated by<br>circulating immunoglobulin                                                           | 41 | 32.03 | 1.13E-06 | 2.17  |
| BP | Regulation of T cell activation                                                                                                                                    | 15 | 11.72 | 1.27E-06 | 5.11  |
| BP | Cytokine production                                                                                                                                                | 9  | 7.03  | 1.29E-06 | 11.24 |
| BP | Regulation of leukocyte cell-cell adhesion                                                                                                                         | 13 | 10.16 | 1.42E-06 | 6.08  |
| BP |                                                                                                                                                                    | 18 | 14.06 | 2.20E-06 | 3.99  |
| BP |                                                                                                                                                                    | 13 | 10.16 | 2.28E-06 | 5.81  |

|    |                                                                     |     |       |          |       |
|----|---------------------------------------------------------------------|-----|-------|----------|-------|
| BP | Cell migration                                                      | 25  | 19.53 | 2.39E-06 | 2.95  |
| BP | Positive regulation of T cell activation                            | 11  | 8.59  | 2.46E-06 | 7.33  |
| BP | Regulation of cell adhesion                                         | 18  | 14.06 | 2.83E-06 | 3.92  |
| BP | Regulation of biological process                                    | 101 | 78.91 | 3.08E-06 | 1.29  |
| BP | Positive regulation of leukocyte cell-cell adhesion                 | 11  | 8.59  | 3.43E-06 | 7.06  |
| BP | Immunoglobulin mediated immune response                             | 10  | 7.81  | 3.54E-06 | 8.18  |
| BP | Regulation of complement activation                                 | 6   | 4.69  | 3.88E-06 | 24.69 |
| BP | B cell mediated immunity                                            | 10  | 7.81  | 3.89E-06 | 8.09  |
| BP | Leukocyte proliferation                                             | 12  | 9.38  | 4.88E-06 | 6.00  |
| BP | Regulation of protein activation cascade                            | 6   | 4.69  | 5.19E-06 | 23.32 |
| BP | Cellular response to organic substance                              | 35  | 27.34 | 5.31E-06 | 2.24  |
| BP | Complement activation, classical pathway                            | 8   | 6.25  | 6.53E-06 | 11.31 |
| BP | Response to bacterium                                               | 16  | 12.50 | 6.96E-06 | 4.12  |
| BP | Regulation of phagocytosis                                          | 7   | 5.47  | 7.83E-06 | 14.62 |
| BP | Response to chemical                                                | 52  | 40.63 | 8.27E-06 | 1.77  |
| BP | Cytokine-mediated signaling pathway                                 | 16  | 12.50 | 8.66E-06 | 4.04  |
| BP | Regulation of multicellular organismal process                      | 39  | 30.47 | 9.11E-06 | 2.05  |
| BP | Regulation of tumor necrosis factor production                      | 8   | 6.25  | 9.64E-06 | 10.66 |
| BP | Cellular response to cytokine stimulus                              | 18  | 14.06 | 9.77E-06 | 3.57  |
| BP | Leukocyte chemotaxis                                                | 10  | 7.81  | 9.86E-06 | 7.21  |
| BP | Regulation of proteolysis                                           | 18  | 14.06 | 1.01E-05 | 3.56  |
| BP | Positive regulation of cell-cell adhesion                           | 11  | 8.59  | 1.07E-05 | 6.21  |
| BP | Cell proliferation                                                  | 31  | 24.22 | 1.13E-05 | 2.33  |
| BP | Regulation of tumor necrosis factor superfamily cytokine production | 8   | 6.25  | 1.16E-05 | 10.37 |
| BP | Cell chemotaxis                                                     | 11  | 8.59  | 1.19E-05 | 6.13  |
| BP | Response to cytokine                                                | 19  | 14.84 | 1.36E-05 | 3.32  |
| BP | Tumor necrosis factor superfamily cytokine production               | 8   | 6.25  | 1.39E-05 | 10.09 |
| BP | Positive regulation of phagocytosis                                 | 6   | 4.69  | 1.43E-05 | 19.08 |
| BP | Proteolysis                                                         | 29  | 22.66 | 1.51E-05 | 2.40  |
| BP | Positive regulation of endocytosis                                  | 8   | 6.25  | 1.56E-05 | 9.91  |

|    |                                        |     |       |          |             |
|----|----------------------------------------|-----|-------|----------|-------------|
| BP | Biological regulation                  | 103 | 80.47 | 1.58E-05 |             |
| CC | Extracellular region                   | 71  | 55.47 | 5.35E-14 | 2.275480146 |
| CC | Extracellular space                    | 38  | 29.69 | 3.89E-13 | 3.899015832 |
| CC | Extracellular region part              | 63  | 49.22 | 5.14E-13 | 2.406973673 |
| CC | Membrane-bounded vesicle               | 57  | 44.53 | 5.98E-11 | 2.338761643 |
| CC | Extracellular exosome                  | 49  | 38.28 | 1.24E-10 | 2.58269921  |
| CC | Extracellular vesicle                  | 49  | 38.28 | 1.47E-10 | 2.569899993 |
| CC | Extracellular organelle                | 49  | 38.28 | 1.49E-10 | 2.568990616 |
| CC | Vesicle                                | 57  | 44.53 | 2.85E-10 | 2.249671895 |
| CC | Blood microparticle                    | 11  | 8.59  | 8.49E-08 | 10.58304297 |
| CC | Extracellular matrix component         | 10  | 7.81  | 1.96E-07 | 11.57520325 |
| CC | Proteinaceous extracellular matrix     | 13  | 10.16 | 5.59E-06 | 5.335495349 |
| CC | Extracellular matrix                   | 15  | 11.72 | 1.25E-05 | 4.193281178 |
| CC | Cell periphery                         | 58  | 45.31 | 2.05E-05 | 1.634975437 |
| CC | Basement membrane                      | 7   | 5.47  | 4.25E-05 | 10.91724433 |
| CC | Plasma membrane                        | 55  | 42.97 | 1.06E-04 | 1.585089105 |
| CC | Integral component of plasma membrane  | 25  | 19.53 | 1.89E-04 | 2.265483205 |
| CC | Plasma membrane part                   | 34  | 26.56 | 2.03E-04 | 1.911775505 |
| CC | Intrinsic component of plasma membrane | 25  | 19.53 | 3.41E-04 | 2.177580859 |
| CC | Collagen trimer                        | 6   | 4.69  | 6.15E-04 | 8.715447154 |
| MF | Peptidase regulator activity           | 14  | 10.94 | 3.32E-09 | 9.260736677 |
| MF | Serine-type endopeptidase activity     | 13  | 10.16 | 1.70E-07 | 7.418965517 |
| MF | Serine-type peptidase activity         | 13  | 10.16 | 4.99E-07 | 6.708639032 |
| MF | Serine hydrolase activity              | 13  | 10.16 | 5.59E-07 | 6.638021779 |
| MF | Endopeptidase activity                 | 16  | 12.50 | 1.34E-06 | 4.703866249 |
| MF | Endopeptidase inhibitor activity       | 10  | 7.81  | 2.94E-06 | 8.363555291 |
| MF | Endopeptidase regulator activity       | 10  | 7.81  | 3.89E-06 | 8.084770115 |
| MF | Peptidase inhibitor activity           | 10  | 7.81  | 4.45E-06 | 7.9522329   |
| MF | Enzyme regulator activity              | 21  | 16.41 | 1.19E-05 | 3.068316369 |
| MF | Glycosaminoglycan binding              | 10  | 7.81  | 1.25E-05 | 6.996435676 |

|    |                                                                              |    |       |          |             |
|----|------------------------------------------------------------------------------|----|-------|----------|-------------|
| MF | Molecular function regulator                                                 | 25 | 19.53 | 1.95E-05 | 2.604256658 |
| MF | Peptidase activity, acting on L-amino acid peptides                          | 17 | 13.28 | 2.41E-05 | 3.49426505  |
| MF | Peptidase activity                                                           | 17 | 13.28 | 3.67E-05 | 3.375088206 |
| MF | Receptor binding                                                             | 25 | 19.53 | 4.08E-05 | 2.488472334 |
| MF | Complement binding                                                           | 4  | 3.13  | 3.23E-04 | 29.10517241 |
| MF | Enzyme inhibitor activity                                                    | 11 | 8.59  | 3.27E-04 | 4.115127205 |
| MF | Transmembrane signaling receptor activity                                    | 21 | 16.41 | 5.07E-04 | 2.334639498 |
| MF | Heparin binding                                                              | 7  | 5.47  | 7.93E-04 | 6.366756466 |
| MF | Transmembrane receptor activity                                              | 21 | 16.41 | 8.43E-04 | 2.24214461  |
| MF | Molecular transducer activity                                                | 24 | 18.75 | 8.57E-04 | 2.078940887 |
| MF | Receptor activity                                                            | 24 | 18.75 | 8.57E-04 | 2.078940887 |
| MF | Signaling receptor activity                                                  | 21 | 16.41 | 1.36E-03 | 2.156699438 |
| MF | Identical protein binding                                                    | 20 | 15.63 | 2.00E-03 | 2.143238028 |
| MF | Protein complex binding                                                      | 14 | 10.94 | 2.14E-03 | 2.659741604 |
| MF | Peptidase activator activity                                                 | 4  | 3.13  | 2.18E-03 | 15.3185118  |
| MF | Extracellular matrix structural constituent                                  | 5  | 3.91  | 2.38E-03 | 8.873528175 |
| MF | Cysteine-type endopeptidase regulator activity involved in apoptotic process | 4  | 3.13  | 2.72E-03 | 14.19764508 |
| MF | Protein homodimerization activity                                            | 13 | 10.16 | 4.10E-03 | 2.591556448 |
| MF | Sulfur compound binding                                                      | 7  | 5.47  | 5.23E-03 | 4.372021607 |
| MF | Protein dimerization activity                                                | 17 | 13.28 | 5.32E-03 | 2.132706599 |
| MF | Cysteine-type endopeptidase activator activity involved in apoptotic process | 3  | 2.34  | 5.85E-03 | 25.68103448 |
| MF | Signal transducer activity                                                   | 22 | 17.19 | 7.67E-03 | 1.815977859 |
| MF | Peptidase activator activity involved in apoptotic process                   | 3  | 2.34  | 8.07E-03 | 21.82887931 |
| MF | Chemokine receptor binding                                                   | 4  | 3.13  | 9.09E-03 | 9.239737274 |
| MF | Carbohydrate binding                                                         | 7  | 5.47  | 9.42E-03 | 3.858640282 |
| MF | Collagen binding                                                             | 4  | 3.13  | 9.49E-03 | 9.095366379 |
| MF | Immunoglobulin binding                                                       | 3  | 2.34  | 9.72E-03 | 19.84443574 |
| MF | Hydrolase activity                                                           | 28 | 21.88 | 1.49E-02 | 1.565395366 |
| MF | Antigen binding                                                              | 5  | 3.91  | 1.94E-02 | 4.850862069 |
| MF | Enzyme activator activity                                                    | 9  | 7.03  | 1.97E-02 | 2.651280888 |

|      |                                              |    |       |          |             |
|------|----------------------------------------------|----|-------|----------|-------------|
| MF   | Cysteine-type endopeptidase activity         | 4  | 3.13  | 2.16E-02 | 6.690844233 |
| MF   | Cytokine receptor activity                   | 4  | 3.13  | 2.36E-02 | 6.467816092 |
| MF   | Protein binding                              | 85 | 66.41 | 2.52E-02 | 1.144706485 |
| MF   | Deoxycytidine deaminase activity             | 2  | 1.56  | 2.70E-02 | 72.76293103 |
| MF   | Serine-type endopeptidase inhibitor activity | 4  | 3.13  | 2.86E-02 | 6.001066477 |
| MF   | CCR chemokine receptor binding               | 3  | 2.34  | 3.03E-02 | 10.91443966 |
| MF   | G-protein coupled receptor binding           | 6  | 4.69  | 3.13E-02 | 3.397490943 |
| MF   | Macromolecular complex binding               | 16 | 12.50 | 3.17E-02 | 1.782858953 |
| MF   | Cell adhesion molecule binding               | 8  | 6.25  | 3.83E-02 | 2.52539457  |
| MF   | Cytokine receptor binding                    | 6  | 4.69  | 3.90E-02 | 3.198370595 |
| MF   | Chemokine activity                           | 3  | 2.34  | 4.40E-02 | 8.909746657 |
| MF   | Protease binding                             | 4  | 3.13  | 4.58E-02 | 4.975243148 |
| MF   | Retinal dehydrogenase activity               | 2  | 1.56  | 4.67E-02 | 41.57881773 |
| KEGG | Pertussis                                    | 10 | 7.81  | 3.77E-08 | 13.352657   |
| KEGG | Staphylococcus aureus infection              | 8  | 6.25  | 8.01E-07 | 14.83628556 |
| KEGG | Complement and coagulation cascades          | 7  | 5.47  | 5.35E-05 | 10.15963033 |
| KEGG | Focal adhesion                               | 10 | 7.81  | 1.67E-04 | 4.861404249 |
| KEGG | Systemic lupus erythematosus                 | 8  | 6.25  | 3.19E-04 | 5.978801644 |
| KEGG | Phagosome                                    | 8  | 6.25  | 7.11E-04 | 5.23633608  |
| KEGG | ECM-receptor interaction                     | 6  | 4.69  | 1.58E-03 | 6.906546727 |
| KEGG | Tuberculosis                                 | 8  | 6.25  | 1.67E-03 | 4.526324408 |
| KEGG | Prion diseases                               | 4  | 3.13  | 4.03E-03 | 12.1387791  |
| KEGG | Cytokine-cytokine receptor interaction       | 8  | 6.25  | 7.13E-03 | 3.483301827 |
| KEGG | Chemokine signaling pathway                  | 7  | 5.47  | 9.64E-03 | 3.768895122 |
| KEGG | Rheumatoid arthritis                         | 5  | 3.91  | 1.08E-02 | 5.690052701 |
| KEGG | Cell adhesion molecules (CAMs)               | 6  | 4.69  | 1.26E-02 | 4.231475811 |
| KEGG | Legionellosis                                | 4  | 3.13  | 1.58E-02 | 7.41814278  |
| KEGG | Regulation of actin cytoskeleton             | 7  | 5.47  | 1.71E-02 | 3.322343568 |
| KEGG | Chagas disease (American trypanosomiasis)    | 5  | 3.91  | 1.89E-02 | 4.814659978 |
| KEGG | PI3K-Akt signaling pathway                   | 9  | 7.03  | 1.92E-02 | 2.612476371 |

|      |                                           |   |      |          |             |
|------|-------------------------------------------|---|------|----------|-------------|
| KEGG | Amoebiasis                                | 5 | 3.91 | 2.01E-02 | 4.723817337 |
| KEGG | Influenza A                               | 6 | 4.69 | 2.78E-02 | 3.453273363 |
| KEGG | Leukocyte transendothelial migration      | 5 | 3.91 | 2.85E-02 | 4.243429133 |
| KEGG | Natural killer cell mediated cytotoxicity | 5 | 3.91 | 3.17E-02 | 4.104300309 |
| KEGG | Primary immunodeficiency                  | 3 | 2.34 | 4.37E-02 | 8.836317136 |
| KEGG | Fc gamma R-mediated phagocytosis          | 4 | 3.13 | 4.94E-02 | 4.768806073 |

**Supplementary Table S7.** Functional enrichment of DEGs identified in mouse diabetic nephropathy

| Category | GO Term/Pathway                              | Gene count | Gene Ratio (%) | P Value  | Fold Enrichment |
|----------|----------------------------------------------|------------|----------------|----------|-----------------|
| BP       | Response to external stimulus                | 30         | 37.97          | 2.78E-09 | 3.27            |
| BP       | Response to stress                           | 37         | 46.84          | 3.43E-09 | 2.64            |
| BP       | Defense response                             | 22         | 27.85          | 1.33E-07 | 3.73            |
| BP       | Cellular response to cytokine stimulus       | 14         | 17.72          | 1.62E-07 | 6.49            |
| BP       | Response to cytokine                         | 15         | 18.99          | 2.94E-07 | 5.59            |
| BP       | Response to nutrient levels                  | 12         | 15.19          | 8.59E-07 | 7.01            |
| BP       | Response to extracellular stimulus           | 12         | 15.19          | 1.73E-06 | 6.52            |
| BP       | Response to other organism                   | 17         | 21.52          | 1.74E-06 | 4.16            |
| BP       | Response to external biotic stimulus         | 17         | 21.52          | 1.76E-06 | 4.15            |
| BP       | Cellular response to interleukin-1           | 7          | 8.86           | 2.07E-06 | 18.31           |
| BP       | Response to organic substance                | 29         | 36.71          | 3.00E-06 | 2.45            |
| BP       | Response to biotic stimulus                  | 17         | 21.52          | 3.50E-06 | 3.94            |
| BP       | Response to chemical                         | 34         | 43.04          | 7.94E-06 | 2.08            |
| BP       | Response to interleukin-1                    | 7          | 8.86           | 7.96E-06 | 14.53           |
| BP       | ERK1 and ERK2 cascade                        | 9          | 11.39          | 8.92E-06 | 8.56            |
| BP       | Positive regulation of ERK1 and ERK2 cascade | 8          | 10.13          | 9.54E-06 | 10.57           |
| BP       | Response to bacterium                        | 13         | 16.46          | 1.08E-05 | 4.86            |
| BP       | Regulation of ERK1 and ERK2 cascade          | 9          | 11.39          | 1.17E-05 | 8.25            |
| BP       | Inflammatory response                        | 12         | 15.19          | 2.51E-05 | 4.92            |
| BP       | Single-organism transport                    | 28         | 35.44          | 2.60E-05 | 2.25            |
| BP       | Response to starvation                       | 7          | 8.86           | 4.47E-05 | 10.72           |

|    |                                                             |    |       |          |       |
|----|-------------------------------------------------------------|----|-------|----------|-------|
| BP | Cellular response to nutrient levels                        | 7  | 8.86  | 5.46E-05 | 10.34 |
| BP | Localization                                                | 39 | 49.37 | 6.99E-05 | 1.74  |
| BP | Monocyte chemotaxis                                         | 5  | 6.33  | 7.37E-05 | 22.03 |
| BP | Single-organism localization                                | 28 | 35.44 | 7.87E-05 | 2.11  |
| BP | Regulation of cell communication                            | 25 | 31.65 | 9.39E-05 | 2.25  |
| BP | Chemokine-mediated signaling pathway                        | 5  | 6.33  | 1.03E-04 | 20.25 |
| BP | Response to stimulus                                        | 52 | 65.82 | 1.03E-04 | 1.46  |
| BP | Cellular response to external stimulus                      | 8  | 10.13 | 1.03E-04 | 7.28  |
| BP | Regulation of signaling                                     | 25 | 31.65 | 1.07E-04 | 2.24  |
| BP | Signal transduction by p53 class mediator                   | 6  | 7.59  | 1.09E-04 | 12.56 |
| BP | Cellular response to organic substance                      | 21 | 26.58 | 1.18E-04 | 2.51  |
| BP | Regulation of signal transduction                           | 23 | 29.11 | 1.26E-04 | 2.34  |
| BP | Regulation of inflammatory response                         | 8  | 10.13 | 1.29E-04 | 7.02  |
| BP | Apoptotic process                                           | 19 | 24.05 | 1.31E-04 | 2.68  |
| BP | Cellular response to extracellular stimulus                 | 7  | 8.86  | 1.38E-04 | 8.75  |
| BP | Defense response to other organism                          | 11 | 13.92 | 1.39E-04 | 4.48  |
| BP | Aging                                                       | 8  | 10.13 | 1.63E-04 | 6.76  |
| BP | Response to lipopolysaccharide                              | 9  | 11.39 | 1.68E-04 | 5.65  |
| BP | Negative regulation of endothelial cell apoptotic process   | 4  | 5.06  | 1.77E-04 | 35.88 |
| BP | Regulation of response to external stimulus                 | 12 | 15.19 | 1.91E-04 | 3.92  |
| BP | Cell death                                                  | 20 | 25.32 | 1.91E-04 | 2.51  |
| BP | Transport                                                   | 32 | 40.51 | 1.95E-04 | 1.86  |
| BP | Positive regulation of phosphate metabolic process          | 14 | 17.72 | 2.04E-04 | 3.34  |
| BP | Positive regulation of phosphorus metabolic process         | 14 | 17.72 | 2.04E-04 | 3.34  |
| BP | Intrinsic apoptotic signaling pathway by p53 class mediator | 5  | 6.33  | 2.04E-04 | 16.97 |
| BP | Response to molecule of bacterial origin                    | 9  | 11.39 | 2.13E-04 | 5.46  |
| BP | Regulation of response to stimulus                          | 27 | 34.18 | 2.19E-04 | 2.04  |
| BP | Programmed cell death                                       | 19 | 24.05 | 2.46E-04 | 2.55  |
| BP | Cytokine-mediated signaling pathway                         | 8  | 10.13 | 2.87E-04 | 6.16  |
| BP | Cellular response to tumor necrosis factor                  | 6  | 7.59  | 2.99E-04 | 10.11 |



|    |                                                                                                                                  |    |       |          |       |
|----|----------------------------------------------------------------------------------------------------------------------------------|----|-------|----------|-------|
| BP | Response to drug                                                                                                                 | 9  | 11.39 | 3.57E-04 | 5.06  |
| BP | Establishment of localization                                                                                                    | 32 | 40.51 | 3.61E-04 | 1.80  |
| BP | Apoptotic signaling pathway                                                                                                      | 10 | 12.66 | 4.39E-04 | 4.32  |
| BP | Response to lipid                                                                                                                | 13 | 16.46 | 4.40E-04 | 3.29  |
| BP | Regulation of cell death                                                                                                         | 17 | 21.52 | 4.44E-04 | 2.64  |
| BP | Myeloid leukocyte migration                                                                                                      | 6  | 7.59  | 4.51E-04 | 9.24  |
| BP | Positive regulation of MAPK cascade                                                                                              | 9  | 11.39 | 4.77E-04 | 4.84  |
| BP | Response to tumor necrosis factor<br>Intrinsic apoptotic signaling pathway in<br>response to DNA damage by p53 class<br>mediator | 6  | 7.59  | 5.04E-04 | 9.02  |
| BP | Regulation of defense response                                                                                                   | 4  | 5.06  | 5.16E-04 | 25.11 |
| BP | Positive regulation of response to stimulus                                                                                      | 10 | 12.66 | 5.67E-04 | 4.16  |
| BP | Response to oxygen levels                                                                                                        | 18 | 22.78 | 5.92E-04 | 2.46  |
| BP | Positive regulation of response to external<br>stimulus                                                                          | 8  | 10.13 | 6.23E-04 | 5.42  |
| BP | Positive regulation of protein phosphorylation                                                                                   | 7  | 8.86  | 6.66E-04 | 6.51  |
| BP | Regulation of endothelial cell apoptotic process                                                                                 | 12 | 15.19 | 6.78E-04 | 3.37  |
| BP | Ion transport                                                                                                                    | 4  | 5.06  | 6.85E-04 | 22.83 |
| BP | Cell migration                                                                                                                   | 15 | 18.99 | 6.88E-04 | 2.78  |
| BP | Negative regulation of epithelial cell apoptotic<br>process                                                                      | 14 | 17.72 | 7.08E-04 | 2.93  |
| BP | Cellular chemical homeostasis                                                                                                    | 4  | 5.06  | 7.31E-04 | 22.32 |
| BP | Positive regulation of intracellular signal<br>transduction                                                                      | 11 | 13.92 | 7.50E-04 | 3.63  |
| BP | Cellular response to chemical stimulus                                                                                           | 12 | 15.19 | 7.57E-04 | 3.33  |
| BP | Positive regulation of defense response                                                                                          | 22 | 27.85 | 7.65E-04 | 2.12  |
| BP | Positive regulation of immune system process                                                                                     | 7  | 8.86  | 7.91E-04 | 6.30  |
| BP | Immune response                                                                                                                  | 11 | 13.92 | 9.15E-04 | 3.53  |
| BP | Single-organism metabolic process                                                                                                | 14 | 17.72 | 9.18E-04 | 2.85  |
| BP | Regulation of extrinsic apoptotic signaling<br>pathway via death domain receptors                                                | 27 | 34.18 | 9.35E-04 | 1.86  |
| BP | Endothelial cell apoptotic process                                                                                               | 4  | 5.06  | 9.39E-04 | 20.50 |
| BP | Response to wounding                                                                                                             | 4  | 5.06  | 9.39E-04 | 20.50 |
| BP | Positive regulation of phosphorylation                                                                                           | 9  | 11.39 | 9.50E-04 | 4.36  |
| BP |                                                                                                                                  | 12 | 15.19 | 9.81E-04 | 3.23  |

|    |                                                |    |       |          |       |
|----|------------------------------------------------|----|-------|----------|-------|
| BP | Positive regulation of inflammatory response   | 5  | 6.33  | 9.85E-04 | 11.21 |
| BP | Leukocyte chemotaxis                           | 6  | 7.59  | 1.04E-03 | 7.69  |
| BP | Response to hypoxia                            | 7  | 8.86  | 1.13E-03 | 5.88  |
| BP | Defense response to bacterium                  | 7  | 8.86  | 1.17E-03 | 5.84  |
| BP | Leukocyte migration                            | 7  | 8.86  | 1.21E-03 | 5.80  |
| BP | Response to endogenous stimulus                | 16 | 20.25 | 1.24E-03 | 2.50  |
| BP | Regulation of MAPK cascade                     | 10 | 12.66 | 1.26E-03 | 3.72  |
| BP | Response to decreased oxygen levels            | 7  | 8.86  | 1.32E-03 | 5.71  |
| BP | Positive regulation of monocyte chemotaxis     | 3  | 3.80  | 1.34E-03 | 53.82 |
| BP | Regulation of phosphate metabolic process      | 16 | 20.25 | 1.45E-03 | 2.46  |
| BP | Regulation of phosphorus metabolic process     | 16 | 20.25 | 1.45E-03 | 2.46  |
| BP | MAPK cascade                                   | 10 | 12.66 | 1.48E-03 | 3.63  |
| BP | Cellular response to starvation                | 5  | 6.33  | 1.48E-03 | 10.05 |
| BP | Signal transduction by protein phosphorylation | 10 | 12.66 | 1.54E-03 | 3.61  |
| BP | Regulation of protein phosphorylation          | 14 | 17.72 | 1.58E-03 | 2.69  |
| BP | Intracellular signal transduction              | 20 | 25.32 | 1.64E-03 | 2.11  |
| BP | Regulation of apoptotic process                | 15 | 18.99 | 1.65E-03 | 2.54  |
| BP | Positive regulation of biological process      | 34 | 43.04 | 1.67E-03 | 1.61  |
| BP | Lymphocyte chemotaxis                          | 4  | 5.06  | 1.69E-03 | 16.74 |
| BP | Positive regulation of leukocyte migration     | 5  | 6.33  | 1.71E-03 | 9.66  |
| BP | Positive regulation of cell communication      | 15 | 18.99 | 1.74E-03 | 2.53  |
| BP | Negative regulation of cell communication      | 13 | 16.46 | 1.74E-03 | 2.81  |
| BP | Multi-organism process                         | 20 | 25.32 | 1.75E-03 | 2.10  |
| BP | Negative regulation of signaling               | 13 | 16.46 | 1.79E-03 | 2.80  |
| BP | Positive regulation of signal transduction     | 14 | 17.72 | 1.80E-03 | 2.65  |
| BP | Positive regulation of signaling               | 15 | 18.99 | 1.81E-03 | 2.52  |
| BP | Response to oxygen-containing compound         | 16 | 20.25 | 1.82E-03 | 2.41  |
| BP | Regulation of programmed cell death            | 15 | 18.99 | 1.82E-03 | 2.51  |
| BP | Cellular homeostasis                           | 11 | 13.92 | 1.96E-03 | 3.19  |
| BP | Cellular response to stress                    | 16 | 20.25 | 2.04E-03 | 2.38  |

|    |                                                                  |    |       |          |       |
|----|------------------------------------------------------------------|----|-------|----------|-------|
| BP | Cell motility                                                    | 14 | 17.72 | 2.06E-03 | 2.61  |
| BP | Localization of cell                                             | 14 | 17.72 | 2.06E-03 | 2.61  |
| BP | Negative regulation of signal transduction                       | 12 | 15.19 | 2.06E-03 | 2.94  |
| BP | Negative regulation of response to stimulus                      | 14 | 17.72 | 2.09E-03 | 2.60  |
| BP | Regulation of response to stress                                 | 13 | 16.46 | 2.17E-03 | 2.74  |
| BP | Regulation of angiogenesis                                       | 6  | 7.59  | 2.26E-03 | 6.44  |
| BP | Negative regulation of cell death                                | 12 | 15.19 | 2.35E-03 | 2.89  |
| BP | Cellular response to lipopolysaccharide                          | 6  | 7.59  | 2.39E-03 | 6.36  |
| BP | Regulation of intracellular signal transduction                  | 15 | 18.99 | 2.54E-03 | 2.43  |
| BP | Organic substance transport                                      | 20 | 25.32 | 2.61E-03 | 2.03  |
| BP | Hormone transport                                                | 7  | 8.86  | 2.73E-03 | 4.94  |
| BP | Cellular response to molecule of bacterial origin                | 6  | 7.59  | 2.76E-03 | 6.15  |
| BP | Regulation of monocyte chemotaxis                                | 3  | 3.80  | 2.76E-03 | 37.67 |
| BP | Regulation of phosphorylation                                    | 14 | 17.72 | 3.00E-03 | 2.50  |
| BP | Positive regulation of protein modification process              | 12 | 15.19 | 3.14E-03 | 2.79  |
| BP | Regulation of epithelial cell apoptotic process                  | 4  | 5.06  | 3.32E-03 | 13.22 |
| BP | Extrinsic apoptotic signaling pathway via death domain receptors | 4  | 5.06  | 3.32E-03 | 13.22 |
| BP | Immune system process                                            | 19 | 24.05 | 3.42E-03 | 2.04  |
| BP | Regulation of vasculature development                            | 6  | 7.59  | 3.44E-03 | 5.84  |
| BP | Negative regulation of apoptotic process                         | 11 | 13.92 | 3.45E-03 | 2.95  |
| BP | Response to temperature stimulus                                 | 5  | 6.33  | 3.54E-03 | 7.90  |
| BP | Chemical homeostasis                                             | 12 | 15.19 | 3.59E-03 | 2.74  |
| BP | Cell chemotaxis                                                  | 6  | 7.59  | 3.62E-03 | 5.77  |
| BP | Innate immune response                                           | 9  | 11.39 | 3.62E-03 | 3.52  |
| BP | Cellular response to biotic stimulus                             | 6  | 7.59  | 3.86E-03 | 5.69  |
| BP | Negative regulation of programmed cell death                     | 11 | 13.92 | 3.86E-03 | 2.90  |
| BP | Response to glucocorticoid                                       | 5  | 6.33  | 3.95E-03 | 7.66  |
| BP | Cellular metal ion homeostasis                                   | 8  | 10.13 | 4.16E-03 | 3.88  |
| BP | Organ regeneration                                               | 4  | 5.06  | 4.26E-03 | 12.10 |
| BP | Response to copper ion                                           | 3  | 3.80  | 4.30E-03 | 30.14 |

|    |                                                                                         |    |       |          |       |
|----|-----------------------------------------------------------------------------------------|----|-------|----------|-------|
| BP | Regulation of transport                                                                 | 16 | 20.25 | 4.35E-03 | 2.20  |
| BP | Lymphocyte migration                                                                    | 4  | 5.06  | 4.40E-03 | 11.96 |
| BP | Negative regulation of response to external stimulus                                    | 6  | 7.59  | 4.51E-03 | 5.48  |
| BP | Positive regulation of metabolic process                                                | 22 | 27.85 | 4.59E-03 | 1.84  |
| BP | Negative regulation of extrinsic apoptotic signaling pathway via death domain receptors | 3  | 3.80  | 4.65E-03 | 28.98 |
| BP | Regulation of leukocyte migration                                                       | 5  | 6.33  | 4.68E-03 | 7.30  |
| BP | Response to hormone                                                                     | 10 | 12.66 | 4.73E-03 | 3.06  |
| BP | Neutrophil chemotaxis                                                                   | 4  | 5.06  | 4.86E-03 | 11.55 |
| BP | Cellular response to amino acid starvation                                              | 3  | 3.80  | 5.01E-03 | 27.90 |
| BP | Positive regulation of leukocyte chemotaxis                                             | 4  | 5.06  | 5.01E-03 | 11.42 |
| BP | Wound healing                                                                           | 7  | 8.86  | 5.18E-03 | 4.33  |
| BP | Response to corticosteroid                                                              | 5  | 6.33  | 5.60E-03 | 6.94  |
| BP | Positive regulation of transport                                                        | 11 | 13.92 | 5.68E-03 | 2.75  |
| BP | Locomotion                                                                              | 14 | 17.72 | 6.07E-03 | 2.30  |
| BP | Organic anion transport                                                                 | 6  | 7.59  | 6.14E-03 | 5.09  |
| BP | Positive regulation of cellular process                                                 | 30 | 37.97 | 6.24E-03 | 1.57  |
| BP | Anion transport                                                                         | 7  | 8.86  | 6.30E-03 | 4.16  |
| BP | Cellular response to endogenous stimulus                                                | 12 | 15.19 | 6.38E-03 | 2.53  |
| BP | Response to heat                                                                        | 4  | 5.06  | 6.76E-03 | 10.25 |
| BP | Cellular divalent inorganic cation homeostasis                                          | 7  | 8.86  | 7.11E-03 | 4.05  |
| BP | Epithelial cell apoptotic process                                                       | 4  | 5.06  | 7.34E-03 | 9.95  |
| BP | Neutrophil migration                                                                    | 4  | 5.06  | 7.34E-03 | 9.95  |
| BP | Angiogenesis                                                                            | 7  | 8.86  | 7.91E-03 | 3.96  |
| BP | Cellular cation homeostasis                                                             | 8  | 10.13 | 8.10E-03 | 3.42  |
| BP | Cellular response to transforming growth factor beta stimulus                           | 5  | 6.33  | 8.20E-03 | 6.22  |
| BP | Small molecule metabolic process                                                        | 15 | 18.99 | 8.25E-03 | 2.13  |
| BP | Granulocyte chemotaxis                                                                  | 4  | 5.06  | 8.39E-03 | 9.48  |
| BP | Metal ion homeostasis                                                                   | 8  | 10.13 | 8.39E-03 | 3.40  |
| BP | Intrinsic apoptotic signaling pathway in response to DNA damage                         | 4  | 5.06  | 8.60E-03 | 9.39  |
| BP | Response to transforming growth factor beta                                             | 5  | 6.33  | 8.63E-03 | 6.13  |

|    |                                                           |    |       |          |        |
|----|-----------------------------------------------------------|----|-------|----------|--------|
| BP | Female pregnancy                                          | 5  | 6.33  | 8.92E-03 | 6.07   |
| BP | Cellular response to growth factor stimulus               | 8  | 10.13 | 9.00E-03 | 3.35   |
| BP | Regulation of leukocyte chemotaxis                        | 4  | 5.06  | 9.05E-03 | 9.22   |
| BP | Regulation of immune system process                       | 12 | 15.19 | 9.11E-03 | 2.41   |
| BP | Divalent inorganic cation homeostasis                     | 7  | 8.86  | 9.14E-03 | 3.84   |
| BP | Cellular ion homeostasis                                  | 8  | 10.13 | 9.24E-03 | 3.34   |
| BP | Regulation of protein modification process                | 14 | 17.72 | 9.61E-03 | 2.17   |
| BP | Positive regulation of cell death                         | 8  | 10.13 | 1.08E-02 | 3.24   |
| BP | Response to growth factor                                 | 8  | 10.13 | 1.10E-02 | 3.22   |
| BP | Positive regulation of cell proliferation                 | 10 | 12.66 | 1.12E-02 | 2.66   |
| BP | Granulocyte migration                                     | 4  | 5.06  | 1.15E-02 | 8.44   |
| BP | Metal ion transport                                       | 9  | 11.39 | 1.17E-02 | 2.88   |
| BP | Antibacterial humoral response                            | 3  | 3.80  | 1.18E-02 | 17.94  |
| BP | Interspecies interaction between organisms                | 8  | 10.13 | 1.25E-02 | 3.14   |
| BP | Symbiosis, encompassing mutualism through parasitism      | 8  | 10.13 | 1.25E-02 | 3.14   |
| BP | Regulation of calcium ion transport                       | 5  | 6.33  | 1.29E-02 | 5.44   |
| BP | Multi-multicellular organism process                      | 5  | 6.33  | 1.33E-02 | 5.39   |
| BP | Extrinsic apoptotic signaling pathway                     | 5  | 6.33  | 1.35E-02 | 5.37   |
| BP | Response to abiotic stimulus                              | 11 | 13.92 | 1.38E-02 | 2.41   |
| BP | Regulation of metal ion transport                         | 6  | 7.59  | 1.39E-02 | 4.16   |
| BP | Cell surface receptor signaling pathway                   | 17 | 21.52 | 1.39E-02 | 1.87   |
| BP | Antimicrobial humoral response                            | 3  | 3.80  | 1.41E-02 | 16.38  |
| BP | Negative regulation of endopeptidase activity             | 4  | 5.06  | 1.43E-02 | 7.79   |
| BP | Positive regulation of cellular protein metabolic process | 12 | 15.19 | 1.44E-02 | 2.26   |
| BP | Regulation of hormone levels                              | 7  | 8.86  | 1.48E-02 | 3.45   |
| BP | Regulation of cellular protein metabolic process          | 17 | 21.52 | 1.50E-02 | 1.86   |
| BP | Positive regulation of chemotaxis                         | 4  | 5.06  | 1.52E-02 | 7.61   |
| BP | Detoxification of copper ion                              | 2  | 2.53  | 1.56E-02 | 125.57 |
| BP | Stress response to copper ion                             | 2  | 2.53  | 1.56E-02 | 125.57 |
| BP | Movement of cell or subcellular component                 | 14 | 17.72 | 1.58E-02 | 2.04   |

|    |                                                                |    |       |          |        |
|----|----------------------------------------------------------------|----|-------|----------|--------|
| BP | Cation homeostasis                                             | 8  | 10.13 | 1.58E-02 | 3.00   |
| BP | Positive regulation of angiogenesis                            | 4  | 5.06  | 1.61E-02 | 7.44   |
| BP | Response to organic cyclic compound                            | 10 | 12.66 | 1.65E-02 | 2.50   |
| BP | Protein phosphorylation                                        | 14 | 17.72 | 1.67E-02 | 2.02   |
| BP | Positive regulation of ion transport                           | 5  | 6.33  | 1.68E-02 | 5.02   |
| BP | Inorganic ion homeostasis                                      | 8  | 10.13 | 1.78E-02 | 2.93   |
| BP | Blood vessel morphogenesis                                     | 7  | 8.86  | 1.92E-02 | 3.26   |
| BP | Positive regulation of apoptotic cell clearance                | 2  | 2.53  | 1.95E-02 | 100.46 |
| BP | Response to toxic substance                                    | 4  | 5.06  | 1.98E-02 | 6.88   |
| BP | DNA damage response, signal transduction by p53 class mediator | 3  | 3.80  | 2.04E-02 | 13.45  |
| BP | Response to gamma radiation                                    | 3  | 3.80  | 2.04E-02 | 13.45  |
| BP | Monocarboxylic acid metabolic process                          | 7  | 8.86  | 2.13E-02 | 3.18   |
| BP | Response to ionizing radiation                                 | 4  | 5.06  | 2.16E-02 | 6.65   |
| BP | Positive regulation of vasculature development                 | 4  | 5.06  | 2.20E-02 | 6.61   |
| BP | Defense response to Gram-negative bacterium                    | 3  | 3.80  | 2.25E-02 | 12.77  |
| BP | Cellular response to oxygen-containing compound                | 10 | 12.66 | 2.28E-02 | 2.36   |
| BP | Positive regulation of protein metabolic process               | 12 | 15.19 | 2.28E-02 | 2.11   |
| BP | Ion homeostasis                                                | 8  | 10.13 | 2.31E-02 | 2.78   |
| BP | Intrinsic apoptotic signaling pathway                          | 5  | 6.33  | 2.32E-02 | 4.55   |
| BP | Stress response to metal ion                                   | 2  | 2.53  | 2.33E-02 | 83.71  |
| BP | Detoxification of inorganic compound                           | 2  | 2.53  | 2.33E-02 | 83.71  |
| BP | Regulation of hydrolase activity                               | 9  | 11.39 | 2.38E-02 | 2.52   |
| BP | Cell communication                                             | 34 | 43.04 | 2.39E-02 | 1.37   |
| BP | Positive regulation of calcium ion import                      | 3  | 3.80  | 2.54E-02 | 11.96  |
| BP | Regulation of extrinsic apoptotic signaling pathway            | 4  | 5.06  | 2.55E-02 | 6.24   |
| BP | Cation transport                                               | 9  | 11.39 | 2.58E-02 | 2.48   |
| BP | Regulation of ion transport                                    | 7  | 8.86  | 2.66E-02 | 3.02   |
| BP | Cellular response to stimulus                                  | 38 | 48.10 | 2.68E-02 | 1.32   |
| BP | Negative regulation of cellular process                        | 26 | 32.91 | 2.71E-02 | 1.48   |
| BP | Viral process                                                  | 7  | 8.86  | 2.80E-02 | 2.98   |

|    |                                                        |    |       |          |       |
|----|--------------------------------------------------------|----|-------|----------|-------|
| BP | Cell activation                                        | 9  | 11.39 | 2.83E-02 | 2.44  |
| BP | Cellular response to lipid                             | 7  | 8.86  | 2.86E-02 | 2.97  |
| BP | Multi-organism cellular process                        | 7  | 8.86  | 2.90E-02 | 2.96  |
| BP | Regulation of protein metabolic process                | 17 | 21.52 | 2.92E-02 | 1.72  |
| BP | Positive regulation of cell migration                  | 6  | 7.59  | 3.08E-02 | 3.38  |
| BP | Signal transduction in response to DNA damage          | 3  | 3.80  | 3.17E-02 | 10.61 |
| BP | Homeostatic process                                    | 13 | 16.46 | 3.30E-02 | 1.91  |
| BP | Regulation of protein transport                        | 8  | 10.13 | 3.38E-02 | 2.56  |
| BP | Regulation of localization                             | 17 | 21.52 | 3.40E-02 | 1.69  |
| BP | Humoral immune response                                | 4  | 5.06  | 3.43E-02 | 5.55  |
| BP | Positive regulation of cell motility                   | 6  | 7.59  | 3.48E-02 | 3.27  |
| BP | Regulation of apoptotic cell clearance                 | 2  | 2.53  | 3.48E-02 | 55.81 |
| BP | Regulation of vasoconstriction                         | 3  | 3.80  | 3.51E-02 | 10.05 |
| BP | Negative regulation of biological process              | 27 | 34.18 | 3.58E-02 | 1.43  |
| BP | Oxoacid metabolic process                              | 8  | 10.13 | 3.65E-02 | 2.52  |
| BP | Cellular response to drug                              | 3  | 3.80  | 3.68E-02 | 9.78  |
| BP | Positive regulation of cellular metabolic process      | 18 | 22.78 | 3.71E-02 | 1.63  |
| BP | Cellular response to interferon-gamma                  | 3  | 3.80  | 3.77E-02 | 9.66  |
| BP | Positive regulation of cellular component movement     | 6  | 7.59  | 3.79E-02 | 3.19  |
| BP | Positive regulation of locomotion                      | 6  | 7.59  | 3.85E-02 | 3.18  |
| BP | Positive regulation of heterotypic cell-cell adhesion  | 2  | 2.53  | 3.86E-02 | 50.23 |
| BP | Blood vessel development                               | 7  | 8.86  | 3.98E-02 | 2.74  |
| BP | Positive regulation of macromolecule metabolic process | 18 | 22.78 | 4.00E-02 | 1.62  |
| BP | Regeneration                                           | 4  | 5.06  | 4.14E-02 | 5.15  |
| BP | Signal transduction                                    | 31 | 39.24 | 4.20E-02 | 1.35  |
| BP | Reproductive structure development                     | 6  | 7.59  | 4.34E-02 | 3.08  |
| BP | Regulation of chemotaxis                               | 4  | 5.06  | 4.35E-02 | 5.05  |
| BP | Negative regulation of angiogenesis                    | 3  | 3.80  | 4.40E-02 | 8.86  |
| BP | Reproductive system development                        | 6  | 7.59  | 4.49E-02 | 3.04  |
| BP | Cellular transition metal ion homeostasis              | 3  | 3.80  | 4.59E-02 | 8.66  |

|    |                                                     |    |       |          |       |
|----|-----------------------------------------------------|----|-------|----------|-------|
| BP | Cellular response to zinc ion                       | 2  | 2.53  | 4.61E-02 | 41.86 |
| BP | Establishment of blood-brain barrier                | 2  | 2.53  | 4.61E-02 | 41.86 |
| BP | Regulation of establishment of protein localization | 8  | 10.13 | 4.63E-02 | 2.39  |
| BP | Negative regulation of blood vessel morphogenesis   | 3  | 3.80  | 4.69E-02 | 8.56  |
| BP | Positive regulation of GTPase activity              | 4  | 5.06  | 4.79E-02 | 4.85  |
| BP | Hormone secretion                                   | 5  | 6.33  | 4.79E-02 | 3.61  |
| BP | Lipid metabolic process                             | 10 | 12.66 | 4.80E-02 | 2.06  |
| BP | Regulation of body fluid levels                     | 5  | 6.33  | 4.84E-02 | 3.60  |
| BP | Vasoconstriction                                    | 3  | 3.80  | 4.88E-02 | 8.37  |
| BP | Phosphate-containing compound metabolic process     | 18 | 22.78 | 4.96E-02 | 1.58  |
| BP | Vasculature development                             | 7  | 8.86  | 4.96E-02 | 2.60  |
| BP | Cell aging                                          | 3  | 3.80  | 4.98E-02 | 8.28  |
| CC | Extracellular region                                | 27 | 34.18 | 2.88E-10 | 4.09  |
| CC | Extracellular space                                 | 25 | 31.65 | 4.09E-10 | 4.42  |
| CC | Extracellular exosome                               | 25 | 31.65 | 2.02E-05 | 2.48  |
| CC | Integral component of plasma membrane               | 10 | 12.66 | 2.31E-02 | 2.36  |
| MF | Chemokine activity                                  | 5  | 6.33  | 4.05E-05 | 25.60 |
| MF | Chemokine receptor binding                          | 5  | 6.33  | 9.78E-05 | 20.48 |
| MF | Cytokine activity                                   | 7  | 8.86  | 3.19E-04 | 7.48  |
| MF | Receptor binding                                    | 17 | 21.52 | 3.71E-04 | 2.67  |
| MF | G-protein coupled receptor binding                  | 7  | 8.86  | 7.44E-04 | 6.37  |
| MF | Cytokine receptor binding                           | 7  | 8.86  | 1.18E-03 | 5.83  |
| MF | Secondary active transmembrane transporter activity | 6  | 7.59  | 2.92E-03 | 6.07  |
| MF | Active transmembrane transporter activity           | 7  | 8.86  | 4.17E-03 | 4.53  |
| MF | Drug transporter activity                           | 3  | 3.80  | 5.22E-03 | 27.30 |
| MF | Enzyme inhibitor activity                           | 7  | 8.86  | 5.40E-03 | 4.29  |
| MF | Glycosaminoglycan binding                           | 5  | 6.33  | 7.95E-03 | 6.27  |
| MF | Peptidase inhibitor activity                        | 5  | 6.33  | 1.13E-02 | 5.66  |
| MF | CCR chemokine receptor binding                      | 3  | 3.80  | 1.18E-02 | 17.98 |
| MF | Transporter activity                                | 12 | 15.19 | 1.19E-02 | 2.32  |



|      |                                                                                                                                                                                             |    |       |          |       |
|------|---------------------------------------------------------------------------------------------------------------------------------------------------------------------------------------------|----|-------|----------|-------|
| MF   | Peptidase regulator activity                                                                                                                                                                | 5  | 6.33  | 1.85E-02 | 4.88  |
| MF   | Symporter activity                                                                                                                                                                          | 4  | 5.06  | 2.02E-02 | 6.83  |
| MF   | Oxidoreductase activity, acting on paired donors, with incorporation or reduction of molecular oxygen, reduced flavin or flavoprotein as one donor, and incorporation of one atom of oxygen | 3  | 3.80  | 2.13E-02 | 13.16 |
| MF   | Heparin binding                                                                                                                                                                             | 4  | 5.06  | 2.28E-02 | 6.51  |
| MF   | Substrate-specific transporter activity                                                                                                                                                     | 10 | 12.66 | 2.67E-02 | 2.30  |
| MF   | Organic anion transmembrane transporter activity                                                                                                                                            | 3  | 3.80  | 4.29E-02 | 8.99  |
| MF   | Transmembrane transporter activity                                                                                                                                                          | 9  | 11.39 | 4.36E-02 | 2.24  |
| MF   | Anion transmembrane transporter activity                                                                                                                                                    | 4  | 5.06  | 4.36E-02 | 5.04  |
| MF   | Endopeptidase inhibitor activity                                                                                                                                                            | 4  | 5.06  | 4.82E-02 | 4.84  |
| KEGG | Chemokine signaling pathway                                                                                                                                                                 | 5  | 6.33  | 9.27E-03 | 5.79  |
| KEGG | TNF signaling pathway                                                                                                                                                                       | 4  | 5.06  | 1.10E-02 | 8.33  |
| KEGG | Complement and coagulation cascades                                                                                                                                                         | 3  | 3.80  | 4.15E-02 | 8.96  |
